# **1 circZNF827 nucleates a transcription inhibitory complex to balance 2 neuronal differentiation**

3

4 Anne Kruse Hollensen<sup>1</sup>, Henriette Sylvain Thomsen<sup>1</sup>, Marta Lloret-Llinares<sup>1,2</sup>,  
5 Andreas Bjerregaard Kamstrup<sup>1</sup>, Jacob Malthe Jensen<sup>3</sup>, Majbritt Luckmann<sup>1</sup>,  
6 Nanna Birkmose<sup>1</sup>, Johan Palmfeldt<sup>4</sup>, Torben Heick Jensen<sup>1</sup>, Thomas Birkballe  
7 Hansen<sup>1</sup> and Christian Kroun Damgaard<sup>1§</sup>

8

9 <sup>1</sup>Department of Molecular Biology and Genetics, Aarhus University, C.F.

10 Møllers Allé 3, Building 1130, DK-8000 Aarhus C, Denmark

11 <sup>2</sup>European Bioinformatics Institute (EMBL-EBI), European Molecular Biology

12 Laboratory, Wellcome Genome Campus, Hinxton, Cambridge CB10 1SD UK.

13 <sup>3</sup>Bioinformatics Research Centre, Aarhus University, C.F. Møllers Allé 8,

14 Building 1110, DK-8000 Aarhus C, Denmark Denmark

15 <sup>4</sup>Department of Clinical Medicine, Research Unit for Molecular Medicine,

16 Aarhus University, Palle Juul-Jensens Boulevard 99, DK-8200 Aarhus N,

17 Denmark

18

19

20 <sup>§</sup>Corresponding author

21

22

# 1 **Abstract**

2

3 Circular RNAs are important for many cellular processes but their mechanisms  
 4 of action remain poorly understood. Here, we map circRNA inventories of  
 5 mouse embryonic stem cells, neuronal progenitor cells and differentiated  
 6 neurons and identify hundreds of highly expressed circRNAs. By screening  
 7 several candidate circRNAs for a potential function in neuronal differentiation,  
 8 we find that circZNF827 represses expression of key neuronal markers,  
 9 suggesting that this molecule negatively regulates neuronal differentiation.  
 10 Among 760 tested genes linked to known neuronal pathways, knockdown of  
 11 circZNF827 deregulates expression of numerous genes including nerve growth  
 12 factor receptor (NGFR), which becomes transcriptionally upregulated to  
 13 enhance NGF signalling. We identify a circZNF827-nucleated transcription-  
 14 repressive complex containing hnRNP-K/L proteins and show that knockdown  
 15 of these factors strongly augments NGFR regulation. Finally, we show that  
 16 ZNF827 protein is part of the mRNP complex, suggesting a functional co-  
 17 evolution of a circRNA and the protein encoded by its linear pre-mRNA host.

18

19

# 1 Introduction

2

3 The mammalian non-coding transcriptome, which includes long noncoding  
4 RNAs (lncRNAs) and circular RNAs (circRNAs), plays pivotal roles in biological  
5 decisions during differentiation and normal cell maintenance (reviewed in  
6 (Chekulaeva & Rajewsky, 2018; Deveson, Hardwick, Mercer, & Mattick, 2017;  
7 Kopp & Mendell, 2018)). Even though circRNAs were already identified several  
8 decades ago (Capel et al., 1993; Kos, Dijkema, Arnberg, van der Meide, &  
9 Schellekens, 1986; Nigro et al., 1991; Sanger, Klotz, Riesner, Gross, &  
10 Kleinschmidt, 1976), they only recently have emerged as a large class of  
11 abundant noncoding RNAs that exhibit cell type- and tissue-specific expression  
12 patterns (Ashwal-Fluss et al., 2014; Hansen et al., 2013; Jeck et al., 2013;  
13 Memczak et al., 2013; Rybak-Wolf et al., 2015; Salzman, Chen, Olsen, Wang,  
14 & Brown, 2013; Salzman, Gawad, Wang, Lacayo, & Brown, 2012) (reviewed in  
15 (Chekulaeva & Rajewsky, 2018; Ebbesen, Hansen, & Kjems, 2016; Salzman,  
16 2016)). CircRNAs are generated by the canonical spliceosome in a non-linear  
17 backsplicing fashion (Cocquerelle, Mascrez, Hetuin, & Bailleul, 1993; Jeck et  
18 al., 2013; Memczak et al., 2013; Pasman, Been, & Garcia-Blanco, 1996;  
19 Salzman et al., 2012). During circRNA biogenesis, flanking intronic sequences  
20 are thought to bring splice sites within critically close proximity, either by direct  
21 basepairing between inverted repeats (e.g. Alu-repeats) or facilitated by  
22 interactions between flanking intron-bound RNA-binding proteins (RBPs)  
23 (Ashwal-Fluss et al., 2014; Conn et al., 2015; Ebbesen et al., 2016). Most  
24 circRNAs are primarily localized to the cell cytoplasm (Ashwal-Fluss et al.,  
25 2014; Hansen et al., 2013; Jeck et al., 2013; Memczak et al., 2013; Rybak-Wolf

1 et al., 2015; Salzman et al., 2012), and recent evidence suggests that nuclear  
2 export of circRNAs in human cells is influenced by the size of the given  
3 molecules, where larger circRNAs (>800 nucleotides) are dependent on  
4 DExH/D-box helicase UAP56 (DDX39B), whereas smaller species are  
5 dependent on URH49 (DDX39A)(Huang, Liang, Tatomer, & Wilusz, 2018).

6

7 Several reports have provided evidence that circRNAs play important roles in  
8 various fundamental cellular processes. Well described examples are the  
9 CDR1as/ciRS-7 and SRY circRNAs that function to negatively regulate miR-7  
10 and miR-138 activity, respectively, by sequestration (miRNA sponging), leading  
11 to increased mRNA expression of their respective miRNA-targets (Hansen et  
12 al., 2013; Memczak et al., 2013). However, it has also been suggested that the  
13 majority of circRNAs are likely not *bona fide* miRNA sponges, simply due to  
14 relatively low copy numbers and a low number of miRNA binding sites per  
15 molecule, leaving efficient miRNA regulation ambiguous in many cases  
16 (Chekulaeva & Rajewsky, 2018; Ebbesen et al., 2016). Examples of circRNAs  
17 acting as binding scaffolds for RBPs, or RBP sponges, which in turn affect their  
18 canonical function in e.g. pre-mRNA splicing and protein translation, have been  
19 reported (Abdelmohsen et al., 2017; Ashwal-Fluss et al., 2014). Nuclear  
20 variants coined exon-intron circular RNAs (EicRNAs), have, due to their  
21 retention of intronic sequences, been shown to promote transcription by  
22 recruitment of U1 snRNP to transcription units by a not fully clarified mechanism  
23 (Li et al., 2015). Many abundant circRNAs originate from the 5' end of their  
24 precursor transcripts, often giving rise to backsplicing into parts of the 5'UTR of  
25 their linear relative (Jeck et al., 2013; Memczak et al., 2013; Rybak-Wolf et al.,

2015). The prevalence of these AUG circRNAs suggests that at least a subset of circRNAs could have protein-coding potential via a cap-independent translation mechanism (Stagsted, Nielsen, Dagaard, & Hansen, 2019). This is consistent with both early studies of Internal Ribosome Entry Sites (IRES) placed in a circRNA context (Chen & Sarnow, 1995), as well as more recent studies reporting examples of translation-competent circRNAs (AbouHaidar, Venkataraman, Golshani, Liu, & Ahmad, 2014; Legnini et al., 2017; Pamudurti et al., 2017; Yang et al., 2017). However, global analyses of hundreds of ribosome profiling and mass-spec datasets, suggests that these few examples are specialized events, and not a generally applicable function of circRNAs (Stagsted et al., 2019).

RNA-sequencing of RNA isolated from mouse and human tissues along with various cell lines suggests that circRNAs are most abundantly expressed in the brain, compared to other tissues and that circRNAs are particularly enriched in neuronal synaptosomes (Rybak-Wolf et al., 2015). In line with this, cells derived from both embryonal carcinoma (P19) and neuroblastoma (SHSY-5Y) subjected to neuronal/glia differentiation show tightly regulated circRNA expression profiles during neuronal development, that include upregulation of numerous common circRNAs (Rybak-Wolf et al., 2015). Piwecka et al., demonstrated that a ciRS-7 knockout mouse displayed downregulated miR-7 levels, alterations in sensorimotor gating associated with neuropsychiatric disease and abnormal synaptic transmission, suggesting that ciRS-7 and miR-7 are important for normal brain function in the mouse (Piwecka et al., 2017). Adding to the complexity of this regulatory network, a long noncoding RNA

1 (lncRNA), Cyrano, promotes the destruction of miR-7, which in turn upregulates  
 2 ciRS-7 by a still unidentified mechanism (Kleaveland, Shi, Stefano, & Bartel,  
 3 2018). One circRNA, circSLC45A4, which is very abundant in the cortex of the  
 4 mouse and human brain, has recently been shown to negatively regulate  
 5 neuronal differentiation, both in cell cultures and in developing mice, where its  
 6 knockdown dysregulates the balance between specialized cortex neurons by  
 7 unknown molecular mechanisms (Suenkel, Cavalli, Massalini, Calegari, &  
 8 Rajewsky, 2020).

9

10 Despite these intricate molecular interactions between circRNA, miRNA and  
 11 lncRNA, many important questions regarding neuronal differentiation and  
 12 function remain unanswered. For example, it is largely unknown how the tightly  
 13 controlled expression of circRNAs potentially affects neuronal development.  
 14 Here, we present the circRNA inventory of mouse embryonic stem cells  
 15 (mESC), neuronal progenitor cells (NPC) and differentiated glutamatergic  
 16 neurons, which represents a well-established model for CNS-type neuronal  
 17 differentiation (Bibel, Richter, Lacroix, & Barde, 2007). We report thousands of  
 18 RNase R-resistant circRNAs of which many are differentially regulated during  
 19 neuronal development. In a screen for circRNA function using an established  
 20 human model for neuronal differentiation, we identify circZNF827 as a negative  
 21 regulator of neuronal differentiation. Although being almost exclusively  
 22 localized to the cell cytoplasm, the nuclear population of this circRNA impacts  
 23 several genes of relevance in neuronal differentiation, at the level of  
 24 transcription, including nerve growth factor receptor (NGFR), which becomes  
 25 robustly upregulated upon circZNF827 knockdown. Mechanistically, our

1 evidence suggests that circZNF827 is a necessary scaffold for a transcription-  
2 repressive complex containing its own host-encoded protein; ZNF827, together  
3 with hnRNP K and hnRNP L.

4

5

# 1 Results

2

## 3 *The circRNA profile of mESCs changes markedly upon neuronal differentiation*

4 To determine whether circRNAs can influence neuronal differentiation, we  
5 initially mapped the circRNA inventories at different stages of neuronal  
6 differentiation and compared these to other available circRNA datasets of  
7 neuronal origin from mice and humans (Rybak-Wolf et al., 2015). Identification  
8 of circRNAs from RNA-seq experiments has often been based on quantification  
9 of relatively few reads across the circRNA backsplicing junction (circBase  
10 (Glazar, Papavasileiou, & Rajewsky, 2014)), and current circRNA prediction  
11 algorithms inevitably lead to the calling of false positives(Hansen, Veno,  
12 Damgaard, & Kjems, 2016; Jeck & Sharpless, 2014). Hence, to immediately  
13 validate the circular nature of *to-be* called circRNAs, we first performed  
14 standard rRNA depletion and subsequently either included or excluded RNase  
15 R treatment step prior to RNA-sequencing. Specifically, we used an established  
16 differentiation model for CNS-type glutamatergic neurons, based on E14  
17 mouse embryonic stem cells (mESCs) that reportedly yields a purity of  
18 glutamatergic neurons of >90% (Bibel et al., 2007). RNA was isolated from 3  
19 stages of differentiation, mESCs, neuronal progenitor cells (mNPCs) or  
20 neuronal differentiation day 8 (mN8) and rRNA depleted (+/- RNase R) prior to  
21 library preparation and RNA-seq (Figure 1A). Successful differentiation at the  
22 NPC and N8 stages was confirmed by the appearance of elongated inter-  
23 cellular dendritic extensions (N8) (Figure 1 – figure supplement 1A) and robust  
24 upregulation of several classical neuronal markers including, TrkB, MAP2 and  
25 TUBB3 (NPC and N8), while stem cell pluripotency marker Nanog became

1 significantly reduced upon differentiation (Figure 1 – figure supplement 1B).

2 Using available circRNA prediction tools CIRI2 (Gao, Zhang, & Zhao, 2018),

3 find\_circ (Memczak et al., 2013) and CIRCexplorer2 (Zhang et al., 2016) on the

4 non-RNase R-treated RNA, we identified between 792-1167 circRNAs in

5 mESC, 2230-2893 circRNAs in NPC and 1902-2316 circRNAs in differentiated

6 neurons at N8 stage (Figure 1B). Upon RNase R treatment most circRNAs

7 either remained unchanged or became enriched, but a considerable fraction of

8 the predicted circRNAs in mESC, mNPC and mN8 preparations, became

9 depleted by the 3'-5' exonuclease (CIRCexplorer2: 19.5-36.5%; CIRI2: 7.2-

10 16.6%; find\_circ: 38.7-52.3% depleted) (Figure 1 – figure supplement 1C). All

11 prediction algorithms showed a correlation between expression level and

12 RNase R resistance, suggesting that mostly low-count circRNAs candidates

13 are likely false positives (Figure 1 – figure supplement 1D). From a total of 3581

14 enriched circRNAs after RNase R treatment (all stages), 1449 circRNAs

15 overlapped between all 3 circRNA prediction algorithms, and this subset

16 represents a high-confidence circRNA inventory (Hansen, Veno, Damgaard, &

17 Kjems, 2015) (Figure 1C and Table S1). We next assessed the *circular-to-linear*

18 ratio of identified circRNAs (find\_circ), by comparing splice site usage in circular

19 vs. linear splicing events (Memczak et al., 2013; Rybak-Wolf et al., 2015). This

20 analysis revealed vast differences in the steady-state levels of these isoforms

21 and demonstrated that many circRNA species are considerably more abundant

22 than their linear precursors (Figure 1D). Confirming previous results (Rybak-

23 Wolf et al., 2015), introns flanking the circRNAs are generally longer than

24 average introns and circRNAs often tend to cluster at the 5' end of their

25 respective precursor RNA (Figure 1 – figure supplement 1E-F). Our results

1 suggest that in order to obtain high confidence circRNA inventories from RNA-  
2 seq data, it is beneficial to use multiple circRNA prediction algorithms and to  
3 enrich for bona fide circRNAs, by depletion of linear RNAs using RNase R.  
4 We next tested differential circRNA expression during differentiation, which  
5 revealed marked changes in circRNA expression over the 16-day timecourse  
6 (Figure 1E; left panel). Kmeans clustering of circRNAs by expression (Top 100  
7 highest expressed) pattern showed two main clusters with peak expression at  
8 mNPC and mN8 (Figure 1E; right panel). Comparison with previously identified  
9 mouse and human homologue circRNAs, isolated from mouse brain regions or  
10 cell lines of either murine or human origin (Rybak-Wolf et al., 2015), revealed  
11 significant overlap between circRNAs at differentiated stages (e.g. 80% of all  
12 1449 circRNAs found in differentiated murine p19 cells and primary neurons,  
13 45% of Top100 found in human SH-SY5Y and 75% overlap with circRNAs  
14 found in the human ENCODE data previously analysed (Rybak-Wolf et al.,  
15 2015; Stagsted et al., 2019)) (Figure 1 – figure supplement 1G). We confirmed  
16 differential expression of a subset of the most abundant and upregulated  
17 circRNAs (circTULP4, circMAGI, circRMST, circEZH2, circHDGFRP3,  
18 circZFP827, circMEDL13, circZFP609, circSLC8A1, circNFIX) using RT-qPCR  
19 with amplicons across the backsplicing junction (Figure 1F-G). 75% of the top-  
20 100 expressed mouse circRNAs was also found in human circRNA datasets  
21 (Rybak-Wolf et al., 2015) (Figure 1 – figure supplement 1G). We conclude that  
22 significant changes in circRNA expression patterns are induced upon neuronal  
23 differentiation and that the majority of these circRNAs are conserved between  
24 various neuronal cell-types originating from humans and the mouse.

25

# 1 *Knockdown of circZNF827 stimulates neuronal marker expression*

2 To ascertain whether the highly upregulated circRNAs might contribute to the  
3 process of neuronal differentiation, we next depleted a number of candidate  
4 circRNAs by RNA interference. We first tested knockdown efficiency of  
5 circZfp827 (circZNF827 in humans) by lentivirally delivered dishRNAs (Kaadt  
6 et al., 2019) targeting the backsplicing junction in either mESC, p19, SH-SY5Y  
7 or L-AN-5 cells, of which the latter three cell lines are well established models  
8 of neuronal differentiation following retinoic acid treatment. Knockdown  
9 efficiency in mESC and p19 proved relatively poor (30-60% remaining circRNA)  
10 compared to the two human cell lines: SH-SY5Y (10% remaining) and L-AN-5,  
11 which displayed superior results (<8% remaining) (Figure 2A and Figure 2 –  
12 figure supplement 1A). Moreover, when testing SH-SY5Y cells for an increase  
13 of neuronal differentiation markers *TrkB*, *NEFL*, *MAP2* and *TUBB3* upon  
14 retinoic acid treatment, only *TrkB* was significantly upregulated upon  
15 differentiation (Figure 2 – figure supplement 1B), whereas these genes showed  
16 a more expected and dynamic expression pattern in L-AN-5 cells (Figure 2B).  
17 We therefore transduced L-AN-5 cells with lentiviral dishRNA vectors to  
18 perform knockdown of 14 candidate circRNAs (Figure 2 – figure supplement  
19 1C; circTULP4, circSLC8A1, circZNF609, circHDGFRP3, circMAGI, circRMST,  
20 circZNF827, circANKIb, circMED13L, circCDYL, circUNC79, circHIPK3,  
21 circNFIIX, circCAMSAP1) (Table S2) and subsequently subjected these to  
22 retinoic acid-induced differentiation followed by neuronal marker quantification  
23 in order to probe for changes in differentiation. In general, we observed efficient  
24 knockdown (Figure 2A and Figure 2 – figure supplement 1C). While the majority  
25 of knockdowns did not significantly change neuronal marker expression,

1 knockdown of circZNF827 (and to a lesser extent circANKlb), produced a  
2 significant and reproducible increase in neuronal marker expression upon  
3 differentiation (Figure 2B and Figure 2 – figure supplement 2A). Importantly,  
4 the linear ZNF827 mRNA was not affected by backsplicing junction-specific  
5 knockdown (Figure 2 – figure supplement 2B). The upregulation of neuronal  
6 markers following circZNF827 knockdown was also evident at the protein level  
7 for MAP2 and TUBB3 (Figure 2C, and quantified to the right). In addition,  
8 proliferation assays demonstrated a smaller S-phase population (32% to 24%)  
9 upon circZNF827 knockdown, suggesting lowered replication kinetics (Figure  
10 2D and Figure 2 – figure supplement 3A-B). This phenomenon was  
11 accompanied by a minor stall in G<sub>2</sub>/M phase, while G<sub>0</sub>/G<sub>1</sub> phase was not  
12 significantly affected between control and circZNF827 knockdown. Taken  
13 together, our results suggest that circZNF827 exerts a repressive effect on  
14 proliferation, neuronal marker expression and hence differentiation.

15

#### 16 *circZNF827 controls retinoic acid receptor homeostasis*

17 We next asked whether the Retinoic Acid Receptors (RARs), which represent  
18 central nodes in relaying anti-proliferative differentiation cues during neuronal  
19 development (Gudas & Wagner, 2011), and are key targets of retinoic acid,  
20 also become upregulated upon knockdown of circZNF827. Indeed, knockdown  
21 of circZNF827 leads to a moderate but significant increased expression (1.5-  
22 2.5 fold) of *RAR $\alpha$*  and *RAR $\gamma$* , while *RAR $\beta$*  remained constant (Figure 3A). Since  
23 most circRNAs have been reported to predominantly localize in the cell  
24 cytoplasm, we addressed the localization of circZNF827, circANKlb and  
25 circTULP4 by cellular fractionation. These circRNAs are mainly cytoplasmically

1 localized in L-AN-5 cells (~90% cytoplasmic signal) (Figure 3B). We therefore  
 2 hypothesized that circZNF827 could potentially affect *RAR*-mRNA stability  
 3 post-transcriptionally in the cell cytoplasm. However, BrU pulse-chase mRNA  
 4 decay assays demonstrated no significant change in *RAR*-mRNA decay rates  
 5 upon knockdown of circZNF827 (Figure 3C). Next, we investigated transcription  
 6 rates, by treating cells with a short pulse of BrU, followed by BrU  
 7 immunoprecipitation to quantify *de novo* labeled RNA, serving as a proxy for  
 8 transcription rates during control- or knockdown of circZNF827. As expected  
 9 from the constant mRNA decay rates, BrU incorporation was upregulated, upon  
 10 circZNF827 knockdown (Figure 3 – figure supplement 1). Our results suggest  
 11 that circZNF827 contributes to controlling RA-receptors transcriptionally, in  
 12 order to keep neuronal differentiation in check.

13

#### 14 *circZNF827 knockdown affect multiple genes in neuronal signaling*

15 Our results indicate that L-AN-5 cells are lowering their proliferation rates and  
 16 promote RAR-signalling by transcriptional upregulation of these transcription  
 17 factors when circZNF827 levels are low. To test how circZNF827 knockdown  
 18 affects other key factors of the neuronal transcriptome, we next performed  
 19 Nanostring analyses using a neuro-differentiation/pathology panel of 760 genes  
 20 with RNA purified from differentiated or non-differentiated L-AN-5 cells. 135  
 21 genes become differentially expressed (9 upregulated and 126 downregulated,  
 22 fold change > +/-2, p<0.05) due to circZNF827 knockdown after differentiation  
 23 (Figure 4A, Table S3). In line with a potential negative regulatory function of  
 24 circZNF827 on neuronal differentiation, GO-term analyses show enrichment of  
 25 terms including axon/dendrite structure, neural cytoskeleton, transmitter

1 synthesis, neural connectivity, growth factor signaling and trophic factors  
2 among differentially expressed genes (Figure 4B). The most significantly  
3 upregulated gene is nerve growth factor receptor (NGFR), which plays a central  
4 role in regulating neuronal differentiation, death, survival and neurite outgrowth  
5 (Yamashita, Tucker, & Barde, 1999; Zhu et al., 2012). Conversely,  
6 Phosphatase and tensin homolog (PTEN), STAT3 and NAD(P)H quinone  
7 dehydrogenase 1 (NQO1) were all significantly downregulated upon  
8 circZNF827 knockdown (2-4 fold), which reportedly also contributes positively  
9 to neuronal differentiation (Lyu et al., 2015; Ma, Zhou, Chai, Wang, & Huang,  
10 2017), and in case of the latter, also renders cells more susceptible to energetic  
11 and proteotoxic stress (Hyun et al., 2012). Since NGFR is a key regulator of  
12 neuronal differentiation and the highest upregulated gene upon circZNF827  
13 knockdown, we next focused on the mechanism of its upregulation. Using both  
14 qRT-PCR and western blotting, which demonstrated a strong upregulation at  
15 both the protein and mRNA level (Figure 4C and Figure 4 – figure supplement  
16 1). This upregulation was not due to changes in mRNA decay rates, since BrU  
17 pulse-chase mRNA decay assays yielded nearly identical mRNA half-lives  
18 upon circZNF827 knockdown (Figure 4D). To address whether the observed  
19 changes in gene expression are elicited at the transcriptional level, we  
20 subjected cells to a short BrU-pulse prior to BrU immunoprecipitation and  
21 Nanostring hybridization. Interestingly, NGFR and also ATP8A2 proved to be  
22 highly upregulated (~4-6 fold) at the level of transcription (Figure 4E-F), while  
23 only NQO1 and not PTEN and STAT3 exhibited significantly reduced  
24 transcription activity (ranging from ~1.3 to ~4 fold) (Figure 4E). Also, the MAP2  
25 gene did not change its *de novo* RNA output, suggesting that the tuning of the

1 steady-state levels of *PTEN*, *STAT3* and *MAP2* mRNAs, as initially observed  
2 (Figure 2A and 4A), are mainly facilitated by posttranscriptional changes to  
3 mRNA stability. If circZNF827 is involved in a *direct* transcription-associated  
4 complex that regulates NGFR output, the transcriptional effects elicited by  
5 circZNF827 knockdown would require nuclear knockdown of the circRNA.  
6 Indeed, the use of dicer-independent shRNA (dishRNA) vectors proved very  
7 efficient in depleting nuclear circRNA (Figure 4G).

8 Next, we assayed the cellular impact of *NGFR* upregulation upon circZNF827  
9 knockdown. To this end, we NGF-treated L-AN-5 cells subjected to either  
10 control or circZNF827 knockdown, and quantified downstream signaling output  
11 by quantification of *c-fos*, which is a well-known downstream “immediate early”  
12 target of NGFR signaling. *c-fos* levels increased significantly, strongly indicating  
13 that the higher levels of NGFR protein indeed leads to functional increase in  
14 NGFR signaling (Figure 4H), which can at least in part explain the upregulation  
15 of neuronal markers. Taken together, we conclude that circZNF827 serves to  
16 keep neuronal differentiation ‘in check’ by limiting expression of, and signaling  
17 by, RARs and NGFR.

18

19 *circZNF827 interacts with transcriptional regulators hnRNP K and -L.*

20 To address the mechanism by which these transcriptional and post-  
21 transcriptional events are controlled by circZNF827, we next sought to identify  
22 its protein interactome. To this end, we synthesized biotin-labeled circZNF827  
23 (linear version) and control RNAs (circTULP4, circZNF609, circHDGFRP3 and  
24 circSLC8A1) *in vitro* and subjected these to pull-down experiments using L-AN-  
25 5 cell lysates and streptavidin-coupled magnetic beads as previously described

(Seitz et al., 2017). Silver-stained SDS-PAGE gels of retained proteins revealed unique profiles, suggesting that specific proteins exhibited increased affinity towards circZNF827, although prominent RNA-binding proteins common to both control RNAs and circZNF827 could also be observed (Figure S5A). By subjecting pulled-down fractions to LC-MS/MS, we identified several circZNF827-specific proteins, including hnRNP K and -L, while others (e.g. DHX9 and DDX3X) bound strongly to any of the bait RNAs (Figure 5A). To validate these interactions, we performed RNA-immunoprecipitation (RIP) using monoclonal anti-hnRNP K or -L antibodies followed by qRT-PCR across the backsplicing junction, and observed a significant enrichment of circZNF827 compared to IgG controls (~100-130 fold), suggesting that these interactions can be recapitulated in L-AN-5 cells (Figure 5B). As expected for these highly expressed RNA binding proteins, both proteins associate with GAPDH mRNA, but in the case of hnRNP L, the IP/input ratios were ~18 fold higher for circZNF827, whereas hnRNP K displayed a similar enrichment of GAPDH mRNA as of circZNF827 (Figure 5B). Scrutinizing the circZNF827 sequence for putative binding sites for hnRNP K and -L using eCLIP datasets (ENCODE consortium), proved unfeasible due to low expression levels of the ZNF827 gene in the K562 and HepG2 cells used by ENCODE. Using RBPmap(Paz, Kosti, Ares, Cline, & Mandel-Gutfreund, 2014), which is based on established RBP consensus binding sequences, revealed a potential high affinity cluster for primarily hnRNP L binding and one site for hnRNP K in the most 3' part of the circle-encoding sequence (Figure 5 – figure supplement 1B-C). According to circZNF827 secondary RNA structures predicted by Mfold, these binding sites are located into mostly single stranded regions within the circRNA, consistent

1 with the binding preferences of most hnRNP proteins towards single stranded  
2 RNA (Figure 5 – figure supplement 1D). To further characterize these  
3 interactions we prepared a stable HEK293 Flp-In T-rex cell-line expressing  
4 circZNF827 (Figure 5 – figure supplement 1E-F) under the control of a  
5 tetracycline inducible promoter (tet-on), based on the laccase vector system  
6 (Kramer et al., 2015). We then performed RIP by immunoprecipitation of  
7 endogenous hnRNP K or -L and observed a remarkable enrichment of  
8 exogenous circZNF827, compared to control IgG or *GAPDH* mRNA (Figure 5C  
9 and E). hnRNP L gave a particularly high IP/Input ratio (~200 fold enrichment),  
10 consistent with the results from: 1) the L-AN-5 RIP, 2) the pull-down LC-MS/MS  
11 experiment and 3) the prediction of several hnRNP L binding site clusters in  
12 circZNF827. We conclude that both hnRNP K and -L can be found in complex  
13 with endogenous or exogenous circZNF827 in both L-AN-5 and HEK293 Flp-in  
14 T-Rex cells.

15

#### 16 *Increasing expression of circZNF827 induces distinct hnRNP K nuclear foci*

17 hnRNP K is a well-documented transcriptional regulator (Moumen, Masterson,  
18 O'Connor, & Jackson, 2005; Thompson et al., 2015) that is reported to interact  
19 directly with hnRNP L and -U (Havugimana et al., 2012; Kim, Hahm, Kim, Choi,  
20 & Jang, 2000; Wan et al., 2015) and bind both DNA and RNA (Tomonaga &  
21 Levens, 1995). To assess interactions between hnRNP K, -L and -U, and their  
22 potential dependence on circZNF827, we performed co-immunoprecipitation  
23 experiments using FLAG-tagged hnRNP K, -L and -U, and subsequently  
24 probed for their interaction with endogenous proteins (Figure 5D) in HEK293  
25 cells either overexpressing circZNF827 or not. hnRNP K co-

1 immunoprecipitates both hnRNP U and hnRNP L (long isoform), but these  
2 interactions remain unaffected by increased expression of circZNF827 (Figure  
3 5D). In accordance with these findings, immunoprecipitation of endogenous  
4 hnRNP K and -L proteins in HEK293 Flp-in cells, with or without laccase-driven  
5 overexpression of circZNF827, confirmed that a hnRNP L/ hnRNP K complex  
6 can indeed be detected (Figure 5E, left), and that this complex is not affected  
7 by expression of circZNF827 (Figure 5E, right). Hence, circZNF827 likely does  
8 not regulate bulk hnRNP K/L-complex assembly/disassembly *per se*.

9 To test whether circZNF827 potentially regulate the normal subcellular  
10 distribution of hnRNP K, L-AN-5 cells were fractionated during control or  
11 circZNF827 knockdown and lysates subjected to western blotting. We observe  
12 a small but significant and reproducible increase in the cytoplasmic population  
13 of hnRNP K upon circZNF827 knockdown, suggesting that circZNF827 retains,  
14 albeit a very small fraction of the hnRNP K population, in the nucleus (Figure  
15 5F). To address this, we overexpressed circZNF827 and monitored hnRNP K  
16 and L localization by immunofluorescence in HEK293 cells. Induction of  
17 circZNF827 led to accumulation of hnRNP K and to a lesser extent hnRNP L in  
18 multiple distinct nuclear foci that were not detected in control cells (Figure 5G).  
19 Taken together, our results suggest that while bulk hnRNP K and L complex  
20 formation is not affected by circZNF827 levels, overexpression of the circRNA  
21 induces specific nuclear localization of hnRNP K and L.

22

23 *hnRNP K or -L knockdown enhances NGFR levels by increasing RNA-PolII*  
24 *engagement on the NGFR gene*

1 Could a circZNF827-dependent hnRNP K/L-containing nuclear complex  
2 regulate the output from the NGFR gene? If such a complex is instrumental in  
3 repressing NGFR, we predict that knockdown of any of these factors would  
4 enhance NGFR expression. In support of a role in hnRNP K-mediated  
5 regulation of NGFR, it was recently reported that hnRNP K knockdown strongly  
6 induces NGFR expression in mouse ES cells (Thompson et al., 2015). To test  
7 this in our context, we designed dishRNAs for hnRNP K and -L, transduced L-  
8 AN-5 cells and assayed for NGFR expression by qRT-PCR or Western blotting.  
9 Both knockdowns increased NGFR expression at both the mRNA and protein  
10 levels, similar to the effect of depleting circZNF827 alone (Figure 6A-B and  
11 Figure 6 – figure supplement 1A-B). However, co-depletion of circZNF827 with  
12 any of these factors strongly augmented NGFR expression (4-5 fold higher than  
13 individual knockdowns) (Figure 6A-B), suggesting that their effects are  
14 synergistic.

15 Given these results, a feasible possibility is that a hnRNP K/L-circZNF827  
16 complex could facilitate transcriptional repression of NGFR by interacting with  
17 gene-regulatory regions, consistent with NGFR upregulation upon circZNF827  
18 knockdown. To this end, publicly available ChIP-seq data (ENCODE  
19 consortium) in K562 and HepG2 cells demonstrate that hnRNP K indeed  
20 interacts with transcription regulatory regions (promoter proximal) of the NGFR  
21 gene (Figure 6 – figure supplement 1C). To determine the circZNF827-  
22 dependence of a hnRNP K-containing complex that docks at the promoter  
23 region of NGFR gene in L-AN-5 cells, we next performed hnRNP K and RNA  
24 PolII ChIP in the presence or absence of circZNF827 and assayed for the  
25 NGFR promoter region by qPCR. Our results show that RNA-PolII engagement

1 is increased at the NGFR promoter, while hnRNP K engagement is decreased  
2 upon circZNF827 knockdown compared to the GAPDH gene (Figure 6C), which  
3 displayed constant transcription rates in our previous BrU pulse labeling assay.  
4 We next wondered how this circRNP complex can interact with chromatin. It  
5 was recently demonstrated that hnRNP K partakes in a complex with  
6 chromatin-bound KRAB-domain zinc finger proteins (KRAB-ZNFs), and that  
7 hnRNP K is necessary for recruitment of a transcription inhibitory  
8 SETDB1/KAP1 complex, which catalyzes H3K27 trimethylation and  
9 heterochromatin formation (Thompson et al., 2015). We therefore hypothesized  
10 that ZNF827 protein, which does not harbor a discernible KRAB domain, could  
11 interact with either hnRNP K and/or its encoded circRNA and perhaps link this  
12 complex to the NGFR promoter. To this end, we performed ZNF827  
13 immunoprecipitation and found it to strongly associate with hnRNP K and to a  
14 lesser extent with hnRNP L in nucleoplasmic extracts (Figure 6D, left). Upon  
15 sonication of the remainder from the Triton X-100 extracted cleared lysates  
16 (chromatin enriched), we observed an even stronger association of hnRNP K  
17 with ZNF827, suggesting that the complex is chromatin bound (Figure 6D,  
18 right). When assessing the ability of ZNF827 to interact with circZNF827, we  
19 observed a strong enrichment over IgG (~18 fold), and ZNF827 protein co-  
20 immunoprecipitated circZNF827 more efficiently than *GAPDH* (~19 fold more  
21 enriched) (Figure 6E).

22 Taken together, our results are consistent with a model where circZNF827  
23 represses NGFR transcription (and likely many other genes) by bridging a  
24 hnRNP K/L-containing inhibitory complex with their genomic loci, possibly  
25 facilitated by the ZNF827 protein, which in turn contributes to keeping an

1 important balance between neuronal differentiation and self-  
2 renewal/proliferation in L-AN-5 cells (Figure 7).

3

#### 4 **Discussion**

5

6 Circular RNAs are by now considered as an important class of abundant and  
7 conserved RNAs but their functional potential has not been fully elucidated yet.  
8 Here, we identified high-confidence circRNA inventories of E14 mESCs, NPCs  
9 and differentiated glutamatergic neurons, and show a generally high degree of  
10 conservation among circRNAs previously identified using cell lines and tissues  
11 of neuronal origin (Rybak-Wolf et al., 2015). Three different circRNA prediction  
12 pipelines, CIRI2 (Gao et al., 2018), find\_circ (Memczak et al., 2013) and  
13 CIRCexplorer2 (Zhang et al., 2016), displayed marked differences in their  
14 predictions, which is in line with our earlier observations (Hansen et al., 2016).  
15 This could indicate that many reported circRNAs are false positives, especially  
16 when expressed at low levels. A surprisingly large fraction of initially called  
17 circRNAs by the three pipelines becomes depleted upon RNase R treatment  
18 (between 7,2% and 52,3%), with CIRI2 clearly being the most robustly  
19 performing predictor in terms of RNase R resistance. Among 3581 RNase R-  
20 resistant circRNAs, only 1449 were called by all three algorithms, suggesting  
21 that caution should be taken when predicting circRNAs from RNA-seq data and  
22 that including multiple prediction algorithms and/or an RNase R step prior to  
23 RNA-seq is beneficial.  
24 Analyzing circRNA expression over the three neuronal developmental stages,  
25 we identified 116 differentially expressed circRNAs (>2-fold change). Of 14

1 tested circRNA candidates, knockdown of circZNF827 in human L-AN-5 cells  
2 had a significant and positive impact on the expression of several classical  
3 neuronal markers, suggesting that the circRNA normally exerts a negative role  
4 in neuronal differentiation. Among 760 genes important to neuronal  
5 differentiation and disease, we found that NGFR was most strongly induced,  
6 also at the protein level, upon circZNF827 knockdown. NGFR is a member of  
7 the TNF superfamily of receptors and relays, along with three paralogous  
8 receptor tyrosine kinases (TrkA, TrkB and TrkC), signals from the 4 mammalian  
9 neurotrophins (Nerve Growth Factor (NGF), brain-derived neurotrophic factor  
10 (BDNF), neurotrophin-3 (NT-3) and neurotrophin 4 (NT-4, aka. NT-4/5)  
11 (Bothwell, 2016). The regulation and functional output from the neurotrophins  
12 and their receptors, which are interdependent proteins, is very complex and  
13 involves a multitude of effector proteins and interaction partners(Bothwell,  
14 2016). NGFR can, depending on expression levels of the other neurotrophin  
15 receptors and their ligands, either induce death- or survival signaling to promote  
16 neuronal differentiation and control axonal growth or apoptosis (Bothwell,  
17 2016). Whether NGFR upregulation is instrumental and causal for the  
18 enhanced expression of TrkB, NEFL, TUBB3 and MAP2 that we observe in the  
19 L-AN-5 neuroblastoma system, remains to be investigated. However, we did  
20 observe strongly augmented c-fos expression (immediate early gene) upon  
21 treatment of L-AN-5 cells with NGF, when circZNF827 was downregulated,  
22 which suggests that TrkA-mediated NGF response becomes enhanced by  
23 increased NGFR expression. It is possible that NGFR is induced to increase  
24 death-signalling, as a result of skewed and sub-optimal stoichiometry between  
25 key neuronal markers/effectors (e.g. TrkB, NEFL, TUBB3 and MAP2). Such a

1 scenario might be part of a normal surveillance system that monitors a strict  
2 and sequential appearance of differentiation factors, however, this awaits  
3 further disclosure in more physiologically relevant cell- and animal models.

4

5 Mechanistically, several lines of evidence support a model in which circZNF827  
6 plays a direct role in the transcriptional repression of the *NGFR* locus,  
7 potentially as a scaffolding-RNA for a hnRNP K-containing complex (Figure 7).  
8 *NGFR* mRNA decay rates remain unchanged upon circZNF827 knockdown,  
9 while steady-state levels increase 3-4 fold. Knockdown of circZNF287 resulted  
10 in significantly higher BrU incorporation rates in *NGFR* pre-mRNA and an  
11 increased association of PolII at the *NGFR* promoter. Importantly, hnRNP K  
12 association with the *NGFR* promoter was decreased upon circZNF287  
13 knockdown. In addition, depletion of either hnRNP K or -L, which both interact  
14 robustly with circZNF827, strongly augmented the transcriptional induction by  
15 circZNF827 knockdown. We observed strong focal nuclear condensates  
16 containing endogenous hnRNP K and -L proteins in HEK293 Flp-in T-Rex cells  
17 stably expressing circZNF827. Although such condensates may be non-  
18 physiological entities (phase-separated hnRNPs), induced by high local  
19 concentrations of circZNF827, these results suggest that the circRNA could  
20 function as a scaffold that nucleates hnRNP K and -L, although not readily  
21 visible in the microscope when circZNF827 levels are significantly lower.

22 It is well established that hnRNP K participates in transcriptional repression.  
23 hnRNP K can bridge classical DNA-binding KRAB-ZNF proteins and a  
24 KAP1/SETDB1-containing complex, which in turn facilitates heterochromatin  
25 formation – also in the *NGFR* gene of ES cells (Thompson et al., 2015). A

1 similar mechanism was described by Huarte and colleagues, where a p53-  
2 induced lincRNA-p21 interacts with hnRNPK, which facilitates silencing of  
3 several downstream targets (Huarte et al., 2010). Interestingly, transcriptional  
4 stimulation, rather than repression, has been reported for intron-containing  
5 circRNAs (ElciRNAs), via recruitment of U1 snRNP to the transcriptional  
6 complex on their parental genes, which by definition requires exon-intron  
7 boundaries (Li et al., 2015). CircZNF827 is a regular exonic circRNA, without  
8 intronic sequences (data not shown), perhaps explaining why it represses  
9 transcription as opposed to ElciRNAs. Another circRNA, circSLC45A4, was  
10 recently also shown to negatively regulate neuronal differentiation, both in cell  
11 cultures and in developing mice, where its knockdown dysregulates the balance  
12 between specialized cortex neurons (Suenkel et al., 2020). How transcription  
13 regulatory factors are recruited to the NGFR promoter (and likely others in the  
14 genome) by this circZNF827-hnRNPK/L complex, remains unknown, but our  
15 finding that hnRNP K can interact with ZNF827 protein, which is a DNA-binding  
16 protein, suggest that the protein encoded by the circZNF827 precursor mRNA,  
17 may play a yet undefined role in this phenomenon. If so, circZNF827 co-  
18 regulates target genes along with its precursor-encoded protein, which argues  
19 for co-evolutionary selection pressure to preserve both circRNA-generating and  
20 protein-coding sequences. circMBNL1 has also been shown to regulate the  
21 activity of its cognate protein product (Ashwal-Fluss et al., 2014), suggesting  
22 that this phenomenon could be a common theme that awaits further  
23 investigation.

24

## 25 **Materials and Methods**

1

2 Sequences of all primers and probes used in the study are specified in Table  
3 S4. Antibodies are described in Table S5.

4

#### 5 *Vector construction*

6 To create plasmids for expression of dishRNAs, sense and antisense  
7 oligonucleotides were annealed and cloned into BglII/XhoI-digested pFRT/U6,  
8 resulting in vectors designated pFRT/U6-dishRNA(Kaadt et al., 2019).  
9 Subsequently, the U6-dishRNA expression cassettes were PCR-amplified from  
10 pFRT/U6-dishRNA vectors and inserted into ClaI/BsiWI-digested pCCL/PGK-  
11 eGFP-MCS(Kaadt et al., 2019). The resulting lentiviral transfer vectors were  
12 designated pCCL/U6-dishRNA-PGK-eGFP-MCS.

13 To generate plasmids for in vitro transcription of circRNAs, the exons encoding  
14 circTULP4, circZNF827, circHDGFRP3, circZNF609, and circSLC8A1 were  
15 PCR-amplified from cDNA prepared from RNA isolated from L-AN-5 cells.  
16 PCR-amplicons encoding circTULP4, circZNF827, circHDGFRP3, and  
17 circSLC8A1 were inserted in BamHI/NotI-digested pcDNA3/PL whereas PCR-  
18 amplicons encoding circZNF609 were inserted in HindIII/NotI-digested  
19 pcDNA3/PL. The resulting plasmids were designated pcDNA3/circRNA. The  
20 plasmid for expression of the CTC lincRNA was constructed as previously  
21 described in (Seitz et al., 2017).

22 For exogenous expression of circZNF827, the exons encoding circZNF827  
23 were PCR-amplified from cDNA prepared from RNA isolated from L-AN-5 cells  
24 and inserted into PacI/SacII-digested pcDNA3.1(+)-Laccase2-MCS-exon-  
25 vector (Kramer et al., 2015). Subsequently, the Laccase-circZNF827

1 expression cassette was inserted into HindIII/NotI-digested pcDNA5\_FRT/TO  
 2 resulting in a vector designated pcDNA5\_FRT/TO-Laccase2-circZNF827.  
 3 To create plasmids for expression of FLAG-tagged RNA binding proteins  
 4 (RBPs), the coding sequences of RBPs hnRNPK, hnRNPL, hnRNPU, DDX3X,  
 5 and DHX9 were PCR-amplified from cDNA prepared from RNA isolated from  
 6 L-AN-5 cells whereas eGFP was sub-cloned from pNEGFP (HindIII/HindIII) and  
 7 inserted into either KpnI/NotI-, BamHI/NotI- or HindIII-digested  
 8 pcDNA5\_FRT/TO-FLAG. The resulting plasmids were designated  
 9 pcDNA5\_FRT/TO-FLAG-RBP. All plasmids were verified by Sanger  
 10 sequencing.

11

## 12 *Cell culturing*

13 L-AN-5 cells were maintained in RPMI whereas SH-SY5Y and HEK293T cells  
 14 were maintained in DMEM medium (Gibco, Dublin, Ireland, 32430100). For all  
 15 three cell lines the cell culture medium was supplemented with 10% fetal bovine  
 16 serum (Gibco, 10082139) and 1% penicillin/streptomycin (Gibco, 15140122).  
 17 P19 cells were maintained in MEM $\alpha$  supplemented with 7.5% newborn calf  
 18 serum (Gibco, 26010074), 2.5% fetal bovine serum (Gibco, 10082139), and 1%  
 19 penicillin/streptomycin (Gibco, 15140122). HEK293 Flp-In T-Rex cells were  
 20 maintained in DMEM supplemented with 10% tetracyclin-free fetal bovine  
 21 serum (Gibco, 10082139) and 1% penicillin/streptomycin (Gibco, 15140122).  
 22 All cells were cultured at 37°C in 5% (v/v) CO<sub>2</sub>.  
 23 For neuronal differentiation of the neuroblastoma cell lines L-AN-5, SH-SY5Y,  
 24 and P19 10  $\mu$ M retinoic acid (RA) (Sigma-Aldrich, St. Louis, Missouri, United  
 25 States) was added to the cell culture medium for four days.

1 The cell line with stable expression of circZNF827 was generated as previously  
 2 described (Hollensen et al., 2018). Briefly, HEK293 Flp-In T-Rex cells were co-  
 3 transfected with pcDNA5-FRT/TO-laccase2-circZNF827 and a plasmid for  
 4 expression of the Flp recombinase (pOG44). Cell culture medium  
 5 supplemented with 100 ng/ml Hygromycin (Thermo Scientific, Waltham,  
 6 Massachusetts, United States) and 10 ng/ml Bastacidin S (Thermo Scientific)  
 7 was used for selection of positive clones. The resulting cell line was designated  
 8 HEK293 Flp-In T-Rex circZNF827. Tetracycline (Tet) concentrations used for  
 9 titration of circRNA induction (Northern blot) were 5 ng/ml, 25 ng/ml, 100 ng/ml  
 10 and 250 ng/ml, respectively. 25 ng/ml Tet was used for RIP experiments and  
 11 250 ng/ml Tet for hnRNP K/L immunofluorescence assays.

12

### 13 *mESC culture and differentiation*

14 E14 mESCs were grown on 0.1% gelatin coated plates in 2i medium(Ying et  
 15 al., 2008) containing: DMEM/F12 (Gibco, 31331) and Neurobasal (Gibco,  
 16 12348) 1:1, N2 supplement (Gibco, 17502048), B27 supplement (Gibco,  
 17 17504044), 1X glutaMax (Gibco, 35050061), 1X penicilin/streptomycin (Gibco,  
 18 15140122), 1 mM sodium pyruvate (Gibco, 11360070), 50 nM 2-  
 19 mercaptoethanol (Gibco, 31350010), nonessential amino acids (Gibco,  
 20 11140076), LIF, 3  $\mu$ M GSK3 inhibitor (CHIR-99021) and 1  $\mu$ M MEK inhibitor  
 21 (PD0325901). They were differentiated into neurons as previously described  
 22 (Bibel et al., 2007) with some modifications. 4 million cells were differentiated  
 23 into embryoid bodies in suspension in petri dishes for bacterial culture in 15ml  
 24 medium containing the same as before, but with 10% FBS and without LIF or  
 25 GSK3 and MEK inhibitors. Every second day, the medium was changed and

1 the embryoid bodies transferred to fresh petri dishes. On days 4 and 6, 5  $\mu$ M  
 2 ATRA (Sigma-Aldrich, R2625) was added to the medium. On day 8 of  
 3 differentiation, the embryoid bodies were disaggregated with 5% trypsin (Gibco,  
 4 15400054) and the cells plated in poly-DL-ornithine (Sigma-Aldrich, P8638) and  
 5 laminin (Sigma-Aldrich, L2020) coated plates in N2 medium, containing  
 6 DMEM/F12 and neurobasal 1:1, N2 supplement, sodium pyruvate, glutaMax,  
 7 15 nM 2-mercaptoethanol, and 50  $\mu$ g/ml BSA. The medium was changed after  
 8 2 h and after 24 h. 48 h after plating the neuronal precursors, the medium was  
 9 changed to complete medium, containing B27 supplement, in addition to the  
 10 N2 medium. Neurons were harvested 2 and 8 days after plating.

11

#### 12 *RNA sequencing and circRNA prediction*

13 20  $\mu$ g RNA from each sample was depleted of rRNA using a Ribo-Zero rRNA  
 14 Magnetic Kit (Epicentre, St Louis, Missouri, United States) including the  
 15 optional RiboGuard RNase inhibitor according to the manufacturer's protocol.  
 16 The concentration was normalised so that each sample contained the same  
 17 amount of RNA. To 1/3 of the sample 1/10 of the recommended amount of  
 18 spike-in (ERCC RNA spike-in mix, Ambion) was added, ethanol precipitated,  
 19 and resuspended in 'Elute, fragment, finish mix' (Illumina, San Diego,  
 20 California, United States). The remaining 2/3 of the sample was ethanol  
 21 precipitated and resuspended in 15  $\mu$ l nuclease free water. The sample was  
 22 heated to 70°C for 1 min and incubated on ice for 2 min. 5  $\mu$ l RNase R mixture  
 23 (Epicentre) was added to the sample before incubation at 37°C for 30 min.  
 24 RNase R was removed by phenol/chloroform extraction. The RNA was  
 25 resuspended in 'Elute, fragment, finish mix' (Illumina). Sequencing libraries

1 were prepared using Truseq stranded RNA LT kit (Illumina) from both Ribo-  
 2 Zero and Ribo-Zero/RNase R samples, by fragmentation, 1<sup>st</sup> and 2<sup>nd</sup> strand  
 3 cDNA synthesis, 3'-end adenylation, ligation of adaptors, and enrichment of  
 4 DNA fragments using the manufacturer's protocol. The quality of the library was  
 5 validated using an Agilent Bioanalyzer 1000 (Agilent Technologies, Santa  
 6 Clara, California, United States). The samples were sequenced using the  
 7 Illumina HiSeq 2500 platform with 100 bp paired-end reads (AROS Applied  
 8 Biotechnology, Aarhus, Denmark).

9 Reads were mapped onto the mm10 genome, and circRNAs were detected and  
 10 quantified using find\_circ (Memczak et al., 2013), CIRCexplorer2 (Zhang et al.,  
 11 2016) (v2.3.3), and circ2 (Gao et al., 2018) (v2.0.6) using default settings except  
 12 for find\_circ, where a stringent mapq threshold of 40 was used for both adaptor  
 13 sequences as proposed previously (Hansen, 2018). The prediction-output from  
 14 all pipelines was merged and intersected, and only circRNAs detected by all  
 15 three pipelines and with three-fold enrichment of backsplice-spanning reads in  
 16 the RNaseR treated samples were defined as bona fide. Expression, based on  
 17 untreated samples quantified circ2, was RPM normalized and the top100  
 18 expressed bona fide circRNAs across all samples were subjected to kmean  
 19 clustering using five centers based on within-clusters sum of squared.  
 20 Annotated genes (UCSC annotation) with at least one splice site in common  
 21 with circRNAs were denoted as host genes, and based on host-gene  
 22 annotation, exon numbers and flanking intron lengths were extracted.

23 The circ-to-linear ratios were based on the backsplice junction spanning reads  
 24 and the mean of upstream and downstream linear spliced reads as quantified  
 25 by find\_circ.

1 To compare with human expression profiles, the top100 expressed circRNAs  
2 were converted from mm10 to hg19 coordinates using liftOver (UCSC), and  
3 only fully matched loci were considered homologous.

4 RNAseq from Rybak-Wolf et al (GSE65926 (Rybak-Wolf et al., 2015)) was  
5 solely analysed with find\_circ using stringent settings as described above.

6

# 7 *Lentiviral production*

8 Third-generation lentiviral vectors were produced in HEK293T cells as  
9 previously described(Hollensen et al., 2017). One day before transfection, cells  
10 were seeded in 10-cm dishes at a density of  $4 \times 10^6$  cells/dish. Transfections  
11 were carried out with 3.75 µg pMD.2G, 3 µg pRSV-Rev, 13 µg pMDLg/pRRE  
12 and 13 µg lentiviral transfer vector using a standard calcium phosphate or  
13 polyethylenimine transfection protocol. Medium was changed to RPMI medium  
14 one day after transfection. Two days after transfection viral supernatants were  
15 harvested and filtered through 0.45 µm filters (Sartorius, Göttingen, Germany).  
16 All lentiviral preparations were made in at least triplicates and pooled before  
17 determination of viral titers. To determine viral titers of lentiviral preparations,  
18 flow cytometric measurements of eGFP expression were used as previously  
19 described(Hollensen et al., 2017). One day prior to transduction, L-AN-5 cells  
20 were seeded at a density of  $5 \times 10^5$  cells/well in 12-well plates. For all lentiviral  
21 preparations, transductions with  $10^2$ - and  $10^3$ -fold dilutions of virus-containing  
22 supernatants were carried out. Both viral supernatants and growth medium  
23 were supplemented with 4 µg/ml polybrene. One day after transduction,  
24 medium was changed. Five days after transduction, cells were harvested and  
25 fixated in 4% paraformaldehyde (Sigma-Aldrich). eGFP expression levels were

1 analyzed on a CytoFLEX flow cytometer (Beckman Coulter, Brea, California,  
2 United States). Lentiviral titers were calculated based on samples with between  
3 1% and 20% eGFP positive cells using the formula: titer (TU/ml) =  $F \cdot C_n \cdot DF / V$ ,  
4 where F represents the frequency of eGFP positive cells,  $C_n$  the total number  
5 of target cells counted the day the transductions were carried out, DF the  
6 dilution factor of the virus and V the volume of transducing inoculum.

7

### 8 *circRNA knockdown and differentiation of L-AN-5 cells*

9 One day prior to transduction with lentiviral vectors encoding circRNA-specific  
10 dishRNAs, L-AN-5 cells were seeded at a density of  $6.6 \times 10^6$  cells/dish in 10-  
11 cm dishes,  $2.2 \times 10^6$  cells/dish in 6-cm dishes, or  $0.8 \times 10^6$  cells/well in 6-well  
12 plates. Transductions were carried out using equal MOIs calculated based on  
13 titers determined by flow cytometry. Both viral supernatants and growth  
14 medium were supplemented with 4  $\mu$ g/ml polybrene. One day after  
15 transduction, medium was changed. Two days after transduction, differentiation  
16 was initiated by addition of 10  $\mu$ M RA (Sigma-Aldrich) to the cell culture  
17 medium. The L-AN-5 cells were differentiated for four days.

18

### 19 *NGF stimulation*

20 Lentiviral transduction and RA-mediated differentiation of L-AN-5 cells were  
21 carried out as described in the section 'circRNA knockdown and differentiation  
22 of L-AN-5 cells'. After four days of differentiation, the L-AN-5 cells were  
23 stimulated with NGF (200 ng/ml) (Thermo Scientific) for 30 min and  
24 subsequently harvested for RNA and protein purification.

25

# 1 *mRNA decay assay*

2 Lentiviral transduction and RA-mediated differentiation of L-AN-5 cells were  
3 carried out as described in the section ‘circRNA knockdown and differentiation  
4 of L-AN-5 cells’. The L-AN-5 cells were cultured in 6-cm dishes containing 6 ml  
5 cell culture medium supplemented with 10  $\mu$ M RA. 4 ml cell culture medium  
6 was aspirated from each 6-cm dish and pooled from cells transduced with the  
7 same dishRNA. For one dish per dishRNA, the residual medium was aspirated  
8 and 3.5 ml of the collected medium was added. For the remaining dishes, the  
9 residual medium was aspirated and 3.5 ml of the collected medium  
10 supplemented with 2 mM BrU (ThermoFisher) was added. 1 hour after addition  
11 of BrU to the cell culture medium, the cells were washed three times in cell  
12 culture medium. 50 min after removal of the BrU-containing cell culture medium  
13 the first samples including the samples not treated with BrU were harvested.  
14 Subsequently, samples were harvested after 3, 6 and 9 hours. Total RNA was  
15 purified using 1 ml TRI Reagent (Sigma-Aldrich) according to manufacturer’s  
16 protocol. circRNA knockdown and differentiation of L-AN-5 cells were verified  
17 by RT-qPCR using total RNA as described in the section ‘Quantitative PCR’.  
18 BrU-labeled RNA was immunoprecipitated as described elsewhere(Meola et  
19 al., 2016). Briefly, BrU antibodies were conjugated to magnetic beads. 15  $\mu$ l  
20 Dynabeads M-280 Sheep Anti-Mouse IgG (Invitrogen, Carlsbad, California,  
21 United States) per sample were washed twice in 1x BrU-IP buffer (20 mM Tris-  
22 HCl (pH 7.5), 250 mM NaCl, 0.5  $\mu$ g/ $\mu$ l BSA, 20 U/ml RiboLock (Fermentas,  
23 Waltham, Massachusetts, United States) and resuspended in 1 ml 1x BrU-IP  
24 buffer with heparin (20 mM Tris-HCl (pH 7.5), 250 mM NaCl, 1 mg/ml heparin).  
25 After 30 min of incubation at room temperature on a rotator the beads were

1 washed in 1x BrU-IP buffer. Subsequently, the beads were resuspended in 1  
2 ml 1x BrU-IP buffer supplemented with 0.9 µl mouse BrdU antibody (BD  
3 Biosciences, San Jose, California, United States, clone 3D4) per sample and  
4 incubated for 1 hour at room temperature on a rotator. The beads were washed  
5 three times in 1x BrU-IP buffer and resuspended in 50 µl 1x BrU-IP buffer  
6 supplemented with 1 mM 5-BrU per sample. After 30 min of incubation at room  
7 temperature on a rotator the beads were washed three times in 1x BrU-IP buffer  
8 and resuspended in 50 µl 1x BrU-IP buffer per sample. 25 µg of total RNA was  
9 diluted to 200 µl and incubated at 80°C for 2 min. 200 µl 2x BrU-IP buffer with  
10 BSA and RiboLock (20 mM Tris-HCl (pH 7.5), 250 mM NaCl, 1 µg/µl BSA, 80  
11 U/ml RiboLock (Thermo Scientific) and 50 µl beads conjugated with BrdU  
12 antibodies were added to the RNA samples. After 1 hour of incubation at room  
13 temperature on a rotator the beads were washed four times in 1x BrU-IP buffer.  
14 For elution of immunoprecipitated RNA the beads were resuspended in 200 µl  
15 0.1% SDS. RNA was purified by phenol/chloroform extraction, ethanol  
16 precipitation and the RNA pellets were resuspended in 10 µl nuclease free  
17 water. 2 µl of immunoprecipitated RNA was used for quantification of mRNA  
18 expression levels by RT-qPCR as described in the section 'Quantitative PCR'  
19 except that DNase treatment was omitted and 1 µg yeast RNA (Roche, Basel,  
20 Switzerland) was added in the cDNA reaction.

21

## 22 *BrU-labeling and immunoprecipitation of newly synthesized RNA*

23 The BrU-labeling and immunoprecipitation of newly labeled RNA were carried  
24 out as for the mRNA decay assay except that the cells were harvested 45 min  
25 after addition of BrU to the cell culture medium. Furthermore, after binding of

1 the RNA to the beads, the beads were washed once in 1x BrU-IP buffer, twice  
2 in 1x BrU-IP buffer supplemented with 0.01% Triton X-100 and twice in 1x BrU-  
3 IP buffer.

4

#### 5 *Subcellular fractionation of nuclear and cytoplasmic RNA*

6 Subcellular fractionation of nuclear and cytoplasmic RNA was carried out as  
7 previously described(Hollensen et al., 2018). Briefly, cells were washed in PBS,  
8 then 800 µl PBS was added and the cells were scraped off. 100 µl of the cell  
9 solution was centrifuged at 12,000 rpm for 10 sec at 4°C. Cell pellets were used  
10 for purification of total RNA using 1 ml of TRI Reagent (Sigma-Aldrich)  
11 according to manufacturer's protocol. The remaining 700 µl of the cell solution  
12 was used for subcellular fractionation of nuclear and cytoplasmic RNA. After  
13 centrifugation at 12,000 rpm for 10 sec at 4°C 300 µl lysis buffer (20 mM Tris-  
14 HCl (pH 7.5), 140 mM NaCl, 1 mM EDTA, 0.5% Igepal-630 (Nonidet P-40))  
15 were added to the cell pellets, which were then incubated on ice for 2 min and  
16 centrifugated at 1,000 g for 4 min at 4°C. Cytoplasmic RNA was purified from  
17 the supernatants using 1 ml TRI Reagent (Sigma-Aldrich) according to the  
18 manufacturer's protocol. Pellets were washed twice in 500 µl lysis buffer,  
19 subjected to a single 5 sec pulse of sonication at the lowest settings (Branson  
20 Sonifier 250) and nuclear RNA was purified using 1 ml TRI Reagent (Sigma-  
21 Aldrich) according to the manufacturer's protocol.

22

#### 23 *Subcellular fractionation of nuclear and cytoplasmic protein*

24 Cells were washed in PBS, then 800 µl PBS were added and the cells were  
25 scraped off. 80 µl of the cell solution was centrifuged at 500 g for 5 min and 200

1     $\mu$ l lysis buffer (1x TBS, 0.5% Igepal-630 (Nonidet P-40)) were added to the cell  
2    pellets for isolation of total protein. The remaining 720  $\mu$ l of the cell solution was  
3    used for subcellular fractionation of nuclear and cytoplasmic protein. After  
4    centrifugation at 12,000 rpm for 10 sec at 4°C cell 300  $\mu$ l lysis buffer were added  
5    and the cell pellets, which were incubated on ice for 2 min and centrifugated at  
6    1,000 g for 4 min at 4°C. The supernatants (cytoplasmic fractions) were  
7    transferred to new tubes. Pellets (nuclear fractions) were washed twice in 500  
8     $\mu$ l lysis buffer and once in 500  $\mu$ l 1x TBS and resuspended in 200  $\mu$ l lysis buffer.  
9    All samples were subjected to two 5 sec pulses of sonication at the lowest  
10    settings (Branson Sonifier 250) followed by centrifugation at 4,000 g for 25 min  
11    at 4°C. Supernatants were transferred to new tubes containing 87% glycerol  
12    (final concentration of 10%) and concentrations were adjusted using Bio-Rad  
13    protein assay (Bio-Rad, Hercules, California, United States).

14

#### 15    *Quantitative PCR*

16    RNA was purified using TRI reagent (Thermo Scientific) according the to  
17    manufacturer's protocol. RNA samples were treated with DNase I (Thermo  
18    Scientific) according to the manufacturer's protocol. First-strand cDNA  
19    synthesis was carried out using the Maxima First Strand cDNA synthesis Kit for  
20    qPCR (Thermo Scientific) according to the manufacturer's protocol. qPCR  
21    reactions were prepared using gene-specific primers (Table S4) and Platinum  
22    SYBR Green qPCR Supermix-UDG (Thermo Scientific) according to the  
23    manufacturer's protocol. An AriaMx Real-time PCR System (Agilent  
24    Technologies) was used for quantification of RNA levels and the  $X_0$  method  
25    was used for calculations of relative RNA levels (Thomsen, Solvsten, Linnet,

1 Blechingberg, & Nielsen, 2010) normalized to either GAPDH or beta-actin  
2 mRNA as indicated.

3

#### 4 *NanoString*

5 Gene expression analysis of 770 neuropathology-related genes were analyzed  
6 using the nCounter Human Neuropathology Panel (NanoString Technologies,  
7 Seattle, Washington, United States) and the nCounter *SPRINT* Profiler  
8 (NanoString Technologies) according to manufacturer's protocol. Data  
9 analysis was carried out in the nSolver 4.0 software (NanoString Technologies)  
10 using the nCounter Advanced Analysis Software (NanoString Technologies).

11

#### 12 *Cell cycle assay*

13 Lentiviral transduction and RA-mediated differentiation of L-AN-5 cells were  
14 carried out as described in the section 'circRNA knockdown and differentiation  
15 of L-AN-5 cells'. Labeling of newly synthesized DNA was carried out using  
16 Click-iT Plus EdU Alexa Flour 647 Flow Cytometry Assay Kit (Thermo  
17 Scientific) according to manufacturer's protocol. Notably, the cell culture  
18 medium of L-AN-5 cells cultured in 6-well plates was supplemented with 10  $\mu$ M  
19 EdU for 1.5 hours. To stain total DNA, cells with already detected EdU were  
20 resuspended in 400  $\mu$ l 1x Click-iT saponin-based permeabilization and wash  
21 reagent from the Click-iT Plus EdU Alexa Flour 647 Flow Cytometry Assay Kit  
22 (Thermo Scientific). Subsequently, RNase A was added to a final concentration  
23 of 0.2 mg/ml. After 5 min of incubation at room temperature, propidium iodide  
24 was added to a final concentration of 5  $\mu$ g/ml and the cells were incubated for  
25 30 min at room temperature. Incorporated EdU and total DNA levels were

1 analyzed on a BD LSRFortessa flow cytometer (BD Biosciences). Data analysis  
2 was carried out in the FLOWJO software (BD Biosciences). The gating strategy  
3 is shown in Figure S2F.

4

#### 5 *Western blotting*

6 Cells were scraped off, pelleted and lysed for 15 min on ice in RSB100 (10 mM  
7 Tris-HCl (pH 7.4), 100 mM NaCl, 2.5 mM MgCl<sub>2</sub>) supplemented with 0.5%  
8 Triton X-100 and 1 pill Complete® protease inhibitor cocktail (Roche). The cell  
9 lysates were subjected to two 5 sec pulses of sonication at the lowest settings  
10 (Branson Sonifier 250) followed by centrifugation at 4,000 g for 15 min at 4°C.  
11 Glycerol was added to the supernatants (final concentration: 10%) and protein  
12 concentrations were adjusted using Bio-Rad protein assay (Bio-Rad). The  
13 protein samples were diluted in 6x loading buffer (9.8% glycerol, 12% SDS, 375  
14 mM Tris-HCl (pH 6.8), 0.03% bromophenol blue, 10% β-mercaptoethanol),  
15 heated at 95°C for 3 min and separated on a Novex WedgeWell 4-12% Tris-  
16 Glycine Gel (Invitrogen). Proteins were transferred to an PVDF Transfer  
17 Membrane (Thermo Scientific) using standard procedures. The membranes  
18 were blocked in 5% skimmed milk powder in PBS for 1 hour at room  
19 temperature. The membranes were incubated at 4°C overnight with primary  
20 antibodies diluted as indicated in Table S5 in 5% skimmed milk powder in PBS.  
21 After three times wash, the membranes were incubated with goat polyclonal  
22 HRP-conjugated secondary antibodies (Dako, Glostrup, Denmark) diluted  
23 1:20,000 in 5% skimmed milk powder in PBS. After 1 hour of incubation at room  
24 temperature, the membranes were washed three times and the bound  
25 antibodies were detected using the SuperSignal West Femto maximum

1 sensitivity substrate (Thermo Scientific) according to the manufacturer's  
2 protocol and using the LI-COR Odyssey system (LI-COR Biosciences, Lincoln,  
3 Nebraska, United States).

4

#### 5 *In vitro transcription*

6 As DNA templates for *in vitro* transcription, pcDNA3/circRNA vectors encoding  
7 the full-length exonic sequences of five human circRNAs were used.  
8 Biotinylated RNAs were produced from 0.5 µg linearized, and  
9 phenol/chloroform extracted template using the MEGAscript® T7 Transcription  
10 Kit (Ambion, Austin, Texas, United States), according to the manufacturer's  
11 protocol with addition of 0.75 mM Biotin-14-CTP (Invitrogen) to the transcription  
12 reaction. In controls, nuclease free water was added instead of Biotin-14-CTP.  
13 The transcribed RNA was purified by phenol/chloroform extraction and  
14 dissolved in nuclease free water.

15

#### 16 *Streptavidin-Biotin pull-down*

17 For each pull-down, 125 µL (bead volume) Pierce® Streptavidin magnetic  
18 beads (Thermo Scientific) pre-washed in NET-2 buffer (50 mM Tris-HCl pH 7.5,  
19 150 mM NaCl, 0.1% Triton X-100) were incubated with 30 µg *in vitro*  
20 synthesized circRNAs or 30 µg control RNA in 500 µL NET-2 buffer for 1 hr.  
21 4°C mixing end-over-end. The conjugated beads were washed once in NET-2  
22 buffer and incubated with 1.5 mL cell lysate prepared as follows: For each pull  
23 down, one 90% confluent 150 mm plate of differentiated L-AN-5 cells was  
24 washed in 10 mL ice cold PBS, and subjected to cell lysis in 1.5 mL hypotonic  
25 gentle lysis buffer (10 mM Tris-HCl pH 7.5, 10 mM NaCl, 2 mM EDTA pH 8.0,

0.1% Triton X-100) supplemented with Complete® protease inhibitor cocktail (Roche, 1 pastel per 10 mL lysis buffer) for 5 min. on ice. Cells were collected by scraping and re-suspension, then supplemented with NaCl to 150 mM final concentration and incubated on ice for 5 min. Cleared cell lysate was obtained by centrifugation at 14,000 rpm, 4°C, 10 min. and supplemented with 10 µL Ribolock RNase Inhibitor (40 U/µL, Thermo Scientific) per 10 mL lysis before incubation with circRNA-coupled streptavidin beads for 1.5 hrs., 4°C mixing end-over-end. From the cleared lysate 1% was mixed 1:1 with 2xSDS-load buffer (20% glycerol, 4% SDS, 100 mM Tris-HCL pH 6.8, 0.05% Bromophenol blue/Xylene cyanol and 10% β-mercaptoethanol) and kept as input sample. Following capture of proteins, beads were washed four times in NET-2 buffer and bound proteins were eluted in 40 µL preheated 2x SDS-load buffer by boiling at 90°C for 5 min. Eluates were subjected to SDS-PAGE electrophoresis and run either completely through and stained with SilverQuest™ Silver staining kit (Life Technologies, Carlsbad, California, United States) according to the manufacturer's protocol, or only 1.5 cm into the gel for subsequent staining with GelCode® Blue Stain Reagent (Thermo Scientific) according to the manufacturer's protocol and excision of the bands for mass spectrometry application (see below).

20

## 21 *Protein analysis by nano-LC-MS/MS*

22 Interacting proteins were identified and quantified according to previously  
23 described methods(Britze, Birkler, Gregersen, Ovesen, & Palmfeldt, 2014).  
24 Briefly, each gel lane was cut into 1×1 mm pieces and cysteine residues were  
25 blocked by reduction and alkylation using tris(2-carboxyethyl)phosphine and

1 iodoacetamide, respectively. In-gel digestion was performed using trypsin and  
2 resulting peptides were extracted from gel pieces using acetonitrile and  
3 trifluoroacetic acid and finally purified on PepClean C-18 Spin columns (Thermo  
4 Scientific). Liquid chromatography tandem mass spectrometry (LC-MS/MS)  
5 was performed on an EASY nanoLC coupled to a Q Exactive Plus Hybrid  
6 Quadrupole-Orbitrap Mass Spectrometer (Thermo Scientific). Peptide samples  
7 were separated on a C-18 reverse phase column (EASY-Spray PepMap from  
8 Thermo Scientific with 25 cm length, 75 µm inner diameter, and 2 µm particle  
9 size) and eluted by a 90 minutes linear gradient of acetonitrile (4–40%)  
10 containing 0.1% formic acid. The MS was operated in data dependent mode,  
11 automatically switching between MS and MS2 acquisition, with mass resolution  
12 of 70,000 and 17,500, respectively. Up to 10 most intense ions were  
13 fragmented per every full MS scan, by higher-energy collisional dissociation.  
14 Dynamic exclusion of 10 seconds was applied and ions with single charge or  
15 unassigned charge states were excluded from fragmentation.

16 MaxQuant software version 1.5.2.8 was applied for protein identification and  
17 label-free quantification by means of peptide peak areas (Cox & Mann, 2008).  
18 MS raw files were searched against a database consisting of 20,197 *Homo*  
19 *sapiens* sequences downloaded from Uniprot.org, August 2015.  
20 Carbamidomethylation of cysteines was set as a fixed modification whereas  
21 methionine oxidation and protein N-terminal acetylation were set as dynamic  
22 modifications. The false discovery rate (FDR) was assessed by searching  
23 against a reverse decoy database, and FDR thresholds of protein and peptide  
24 identification were both set to 0.01.

25

# 1 *Immunofluorescence*

2 For indirect immunofluorescence experiments,  $1 \times 10^5$  HEK293 Flp-In T-Rex or  
3 circZNF827\_HEK293 Flp-In T-Rex cells were grown directly on poly-L-lysine  
4 coated coverslips in 12-well plates. Transcription of circRNA transgene was  
5 induced by addition of 10-250 ng/ml tetracycline and the induction profile was  
6 tested by Northern blotting in a parallel experiment. 24 hrs later cells were fixed  
7 in 4% paraformaldehyde for 15 min, and permeabilized and blocked with  
8 PBS/1% goat serum (or horse serum)/0.5% Triton X-100 for 20 min. Cells were  
9 then incubated for 1-16 hrs with mouse anti-hnRNPK (Abcam, Cambridge,  
10 United Kingdom), Rabbit anti-hnRNPU (Santa Cruz Biotechnologies, Dallas,  
11 Texas, United States) or mouse anti-hnRNPL (Abcam). Antibodies were used  
12 at 1:1,000 dilutions. Following removal of the primary antibody, cells were  
13 incubated for 1 h with 4  $\mu\text{g/mL}$  secondary anti-IgG antibodies labeled with  
14 Alexa-594 and Alexa-488 (Molecular Probes, Eugene, Oregon, United States).

# 16 *RNA immunoprecipitation and co-immunoprecipitation of proteins*

17 For RNA immunoprecipitation (IP) and co-immunoprecipitation (co-IP) of  
18 proteins L-AN-5 cells were seeded at a density of  $6.6 \times 10^6$  cells/dish in 10-cm  
19 dishes and differentiated as described in the section 'Cell culturing'. HEK293  
20 Flp-In T-Rex cells were seeded a density of  $6.6 \times 10^6$  cells/dish in 10-cm dishes.  
21 HEK293 Flp-In T-Rex and HEK293 Flp-In T-Rex circZNF827 cells were  
22 transfected with 5  $\mu\text{g}$  pcDNA5/FRT-TO-FLAG-RBP and 25  $\mu\text{l}$  polyethylenimine  
23 (PEI) (1  $\mu\text{g}/\mu\text{l}$ ) according to a standard PEI transfection protocol. 6 hrs after  
24 transfection, RBP and circRNA expression were induced by addition of 100  
25 ng/ml tetracycline to the cell culture medium. For IP of endogenously expressed

1 proteins, antibodies were conjugated to Protein G dynabeads (Thermo  
2 Scientific) prior to harvest of the cells. 25  $\mu$ l beads per sample were washed  
3 three times in 1 ml NET-2 buffer (50 mM Tris-HCl pH 7.5, 100 mM NaCl, 0.1%  
4 Triton-X100). Subsequently, the beads were resuspended in 800  $\mu$ l NET-2  
5 buffer per sample and added 10  $\mu$ l hnRNP K, hnRNP L, or IgG antibody per  
6 sample. After conjugation for 120 min at 4°C on a rotator, the beads were  
7 washed twice in NET-2 buffer and resuspended in 50  $\mu$ l NET-2 buffer per  
8 sample. For IP of FLAG-tagged proteins, 50  $\mu$ l anti-FLAG-M2 agarose slurry  
9 was washed twice in 1.5 ml NET-2 buffer and resuspended in 50  $\mu$ l NET-2  
10 buffer per sample. The cells were lysed after a single wash in PBS by addition  
11 of 1 ml ice-cold hypotonic gentle lysis buffer (10 mM Tris-HCl pH 7.5, 10 mM  
12 NaCl, 1 mM EDTA, 0.25% Triton-X100, and one pill Complete® protease  
13 inhibitor cocktail (Roche) per 10 ml), scraped off, and transferred to an  
14 Eppendorf tube. After incubation for 5 min on ice 35  $\mu$ l 4 M NaCl (final 150 mM)  
15 was added and the samples were incubated for 2 min on ice. The lysates were  
16 subjected to a single 5 sec pulse of sonication at the lowest settings (Branson  
17 Sonifier 250) and centrifuged at 13,000 rpm for 15 min at 4°C. For input protein  
18 and RNA controls, 50  $\mu$ l and 100  $\mu$ l of the lysate were resuspended in 50  $\mu$ l  
19 2xSDS-load buffer (20% glycerol, 4% SDS, 100 mM Tris-HCL pH 6.8, 0.05%  
20 Bromophenol blue/Xylene cyanol and 10%  $\beta$ -mercaptoethanol) and 1 ml TRI  
21 Reagent (Sigma-Aldrich), respectively. The input protein control samples were  
22 incubated for 3 min at 80-90°C before storage at -20°C. The remainder of the  
23 supernatants was transferred to tubes containing 50  $\mu$ l bead slurry and nutated  
24 at 4°C for 2 h. Subsequently, the beads were washed seven times in 1.5 ml ice-  
25 cold NET-2 and protein was eluted from one third of the beads by addition of

1 100 µl 2xSDS-load buffer followed by incubation for 3 min at 80-90°C whereas  
2 RNA was eluted from two thirds of the beads by addition of 1 ml TRI Reagent  
3 (Sigma-Aldrich).

4

#### 5 *Northern blotting*

6 Northern blots were carried out as previously described in (Damgaard & Lykke-  
7 Andersen, 2011). Briefly, 10 µg RNA was separated on a 1.2% formaldehyde-  
8 agarose gel. Subsequently, the RNA was transferred to a Hybond membrane  
9 (GE Healthcare, Chicago, Illinois, United States). The membrane was  
10 hybridized with circZNF827- or β-actin-specific [<sup>32</sup>P]-end-labeled  
11 oligonucleotides (sequences are specified in Table S4) overnight and  
12 subsequently exposed on phosphorimager screens and visualized on a  
13 Typhoon FLA 9500 (GE Healthcare).

14

#### 15 *ChIP*

16 Lentiviral transduction and RA-mediated differentiation of L-AN-5 cells were  
17 carried out as described in the section 'circRNA knockdown and differentiation  
18 of L-AN-5 cells'. The ChIP assay including crosslinking and harvest of cells  
19 were carried out using the Pierce Magnetic ChIP Kit (Thermo Scientific)  
20 according to the manufacturer's protocol except that sonication was carried out  
21 on a Covaris S2 ultrasonicator (settings: burst: 15%, cycles: 200, intensity: 6,  
22 cycle time: 20 min, frequency sweeping: on, de-gas: on). The antibodies used  
23 for the ChIP assay are listed in Table S5. DNA fragments were quantified as  
24 described in the section 'Quantitative PCR' using the gene-specific primers  
25 listed in Table S4.

1

## 2 *Statistical Analysis*

3 In biochemical assays (conducted in at least biological triplicates) the  
4 significance of difference between samples were calculated by a two-tailed  
5 Student's t test to test the null hypothesis of no difference between the two  
6 compared groups. The assumption of equal variances was tested by an F test.  
7  $p < 0.05$  was considered statistically significant. Data are presented as mean  $\pm$   
8 SD.

9

## 10 **Acknowledgements**

11 Proliferation assays using flow cytometry was performed at the FACS Core  
12 Facility, Aarhus University, Denmark. Karina Hjorth is thanked for excellent  
13 technical assistance. Thanks to Serafin Pinol-Roma for sharing anti-hnRNP  
14 C1/C2 antibody.

15

## 16 **Competing interests**

17 The authors declare no competing interests.

18

19

## 20 **Figure Legends**

21

22 **Figure 1 - Determining the circRNA inventories of mESC, NPC and**  
23 **differentiated glutamatergic neurons and their differential regulation.**

24 (A) Schematic illustration of workflow for differentiation and RNA-seq. (B)  
25 Number of circRNAs detected by indicated circRNA prediction algorithm in

1 different stages. (C) Venn-diagram showing 1449 common circRNAs of a total  
2 of 3581 circRNAs predicted by the different algorithms (as indicated next to the  
3 diagram) that are either constant or enriched upon RNase R treatment. (D)  
4 circRNA/circRNA+linear precursor ratios as a function of expression level  
5 (RPM) at the 3 sequenced stages. (E) Left: Heatmap showing differential  
6 expression of top-100 expressed circRNAs (RPM scale to the right), with  
7 selected examples of circRNAs as indicated along with genomic coordinates  
8 (mm10). Top: K-means analysis displaying 5 different expression profiles  
9 during differentiation (same color code given to the left of the heatmap). (F)  
10 circRNA qRT-PCR strategy spanning the backsplicing junction. (G) qRT-PCR  
11 validation of selected circRNAs. Data are depicted as mean  $\pm$ SD.

12

## 13 **Figure 2 - circZNF827 regulates neuronal marker expression levels.**

14 (A) RT-qPCR analysis evaluating knockdown of circZNF827 with dicer-  
15 independent short hairpin RNAs (dishRNAs) in the neuroblastoma cell line L-  
16 AN-5. (B) Relative mRNA levels of the neuronal markers *TUBB3*, *MAP2*, *NEFL*,  
17 and *TrkB* evaluated by RT-qPCR upon knockdown of circZNF827. The mRNA  
18 expression levels were evaluated by RT-qPCR after four days of RA-mediated  
19 neuronal differentiation. (C) Western blotting (left panel) of TUBB3 and MAP2  
20 upon circZNF827 knockdown. GAPDH was used as loading control. The results  
21 of quantification of band intensities from Western blots are shown in middle and  
22 right panel. (D) Cell cycle assay based on flow cytometric measurements of  
23 EdU incorporation into newly synthesized DNA in L-AN-5 cells upon  
24 circZNF827 knockdown. +RA: differentiated L-AN-5 cells. -RA: undifferentiated  
25 L-AN-5 cells. Irr: Irrelevant dishRNA. In all panels data are depicted as mean

1  $\pm$ SD. Asterisks above bars indicate statistical significance difference relative to  
2 the control (Irr). \* $p$ <0.05; \*\* $p$ <0.01; ns, not significant.

3

4 **Figure 3 - Increased *RAR* expression upon circZNF827 knockdown.**

5 (A) mRNA expression levels of the *RAR* receptors *RAR* $\alpha$ , *RAR* $\beta$  and *RAR* $\gamma$  in  
6 L-AN-5 cells upon circZNF827 knockdown evaluated by RT-qPCR. (B)  
7 Subcellular localization of the circRNAs circZNF827, circANKIB1, and  
8 circTULP4 examined by RT-qPCR after fractionation of differentiated L-AN-5  
9 cells into cytoplasmic and nuclear fractions. *GAPDH* mRNA and  $\beta$ -actin pre-  
10 mRNA levels was used for validation of the purity of the cytoplasmic and  
11 nuclear fractions. (C) BrU pulse-chase mRNA decay assay evaluating decay  
12 rates of *RAR* mRNAs upon circZNF827 knockdown. The *RAR* mRNA  
13 expression levels were evaluated by RT-qPCR. In right panel, half-lives of the  
14 *RAR*s obtained in the experiment are indicated. +RA: differentiated L-AN-5  
15 cells. -RA: undifferentiated L-AN-5 cells. Irr: Irrelevant dishRNA. In all panels  
16 data are depicted as mean  $\pm$ SD. Asterisks above bars indicate statistical  
17 significance difference relative to the control (Irr). \* $p$ <0.05; \*\* $p$ <0.01.

18

19 **Figure 4 - circZNF827 regulates NGFR expression.**

20 (A) Volcano plot based on a Nanostring analysis of the expression of ~800  
21 neuropathology-related genes upon circZNF827 knockdown in L-AN-5 cells vs  
22 control without RA treatment (left panel) or with RA treatment (right panel). (B)  
23 GO-term analysis based on genes found differentially expressed by the  
24 Nanostring analysis upon circZNF827 knockdown in differentiated L-AN-5 cells.  
25 (C) Western blotting (left panel) of NGFR upon circZNF827 knockdown in L-

1 AN-5 cells. GAPDH was used as loading control. The result of quantification of  
2 band intensities from the Western blots is shown in the right panel. (D) BrU  
3 pulse-chase mRNA decay assay evaluating decay rates of *NGFR* mRNAs upon  
4 circZNF827 knockdown. In the bottom panel, the half-lives of *NGFR* obtained  
5 in the experiment are indicated. (E) Volcano plot showing mRNAs with changed  
6 synthesis rates estimated after BrU-labeling of newly synthesized RNA by  
7 Nanostring analysis using the neuropathology panel. (F) RT-qPCR-based  
8 validation of the Nanostring analysis shown in (E). (G) Evaluation of  
9 circZNF827 knockdown in L-AN-5 cells after subcellular fractionation into  
10 nuclear and cytoplasmic RNA fractions by RT-qPCR. *GAPDH* mRNA and  $\beta$ -  
11 *actin* pre-mRNA levels was used for validation of the purity of the cytoplasmic  
12 and nuclear fractions. (H) *c-fos* mRNA levels evaluated by RT-qPCR after  
13 circZNF827 knockdown and NGF stimulation of L-AN-5 cells. +RA:  
14 differentiated L-AN-5 cells. -RA: undifferentiated L-AN-5 cells. Irr: Irrelevant  
15 dishRNA. Data are depicted in C as mean  $\pm$ SEM and in D, F, and G as mean  
16  $\pm$ SD. Asterisks above bars indicate statistical significance difference relative to  
17 the control (Irr). \*p<0.05, \*\*p<0.01, \*\*\*p<0.001.

18

19 **Figure 5 – circZNF827 interacts with and regulates the subcellular**  
20 **localization of hnRNP K and -L.**

21 (A) circRNA-RBP complex isolation from differentiated L-AN-5 cells followed by  
22 protein identification using mass spectrometry (LC-MS/MS). IP/Input ratios  
23 (based on IBAQ values) for selected RBPs (hnRNP L, hnRNP L, hnRNP U,  
24 DDX3X and DHX9) pulled down by circZNF827 are shown in left panel. In the  
25 right panel IP ratios of selected RBPs pulled down by circZNF827 relative to IP

ratios for four other circRNAs (circTULP4, circHDGFRP3, circSLC8A1 and circZNF609) are shown. RIP experiment evaluating interaction between circZNF827 and hnRNP K and -L in differentiated L-AN-5 cells (B) and the HEK293 Flp-In T-rex circZNF827 cell line (C). Co-immunoprecipitation (co-IP) of both exogenously FLAG-tagged (D) and endogenously (E) expressed hnRNP K, -L and -U in HEK293 Flp-In T-rex cells with and without circZNF827 expression. GAPDH and HuR were used as loading controls in (D) and (E) respectively. (F) Western blot evaluating subcellular localization of hnRNP K in differentiated L-AN-5 cells upon circZNF827 knockdown. LARP1 and hnRNP C1/C2 were used for validation of the purity of the cytoplasmic and nuclear fractions. (G) Co-immunofluorescence (co-IF) of hnRNP K, -L and -U in HEK293 Flp-In T-rex cells upon circZNF827 overexpression. Nuclei were visualized by DAPI staining. The scale bar indicates 10  $\mu$ m. Irr: Irrelevant dishRNA. C: cytoplasmic fraction, N: nuclear fraction, T: total cell lysate.

**Figure 6 – circZNF827 regulates hnRNP K activity in L-AN-5 cells.** RT-qPCR (A) and Western blotting (B) evaluating NGFR expression upon co-knockdown of circZNF827 and either hnRNP K or -L in differentiated L-AN-5 cells. GAPDH was used as loading control for the Western blots. (C) ChIP experiment assessing association between the NGFR gene and RNP PolII and hnRNP K upon circZNF827 knockdown in differentiated L-AN-5 cells. (D) Co-immunoprecipitation (co-IP) of ZNF827, hnRNP K and -L in cyto-/nucleoplasm (left) or chromatin fractions (right; sonicated pellets from cleared lysates) of differentiated L-AN-5 cells. IgG was used as IP control. HuR was used as negative control. (E) RNA-immunoprecipitation of circZNF827 by ZNF827. IgG

1 was used as IP control. #1 and #2: two different dishRNAs targeting the same  
2 RBP. Irr: Irrelevant dishRNA. Data in (A) are depicted as mean  $\pm$ SD (three  
3 biological replicates).

4

5 **Figure 7 – Model illustrating how circZNF827 could regulate transcription**  
6 **from key neuronal genes.** The promoter of target genes, e.g. NGFR is bound  
7 by a transcription repressive complex consisting of circZNF827, hnRNP K,  
8 hnRNP L and ZNF827. High levels of circZNF827, induced by neuronal  
9 differentiation keeps further differentiation markers in check (left panel), while  
10 knockdown of circZNF827 (or hnRNP K/L) allows for higher transcription rates  
11 of target neuronal marker genes including NGFR.

12

13 **Figure 1 – figure supplement 1 - (A)** Brightfield image of mESCs subjected to  
14 neuronal differentiation (neuron day 1, 3 and 8). (B) qRT-PCR on pluripotency  
15 and neuronal markers (Nanog, Nestin, TrkB and TUBB3) at different stages in  
16 differentiation. (C) Quantification of RNase R resistant circRNAs. Fraction of  
17 either depleted, unaffected or enriched of total number of circRNAs upon  
18 RNase R treatment as a result of using indicated circRNA prediction algorithm.  
19 The red numbers in each column indicate the percentage of depleted ones. (D)  
20 Expression levels of depleted, unaffected or enriched circRNAs (RPM). (E)  
21 Distribution of length (nucleotides) of circRNA-flanking introns and introns  
22 found in host pre-mRNAs. (F) Frequency of inclusion of 5'proximal exons in  
23 circRNAs.

24 **Figure 2 – figure supplement 1 - (A)** Evaluation of dishRNA-mediated  
25 knockdown efficiencies of circZNF827 in mESCs, P19 cells and SHSY-5Y cells

1 by RT-qPCR. (B) Evaluation of mRNA expression levels of the neuronal  
2 markers *TUBB3*, *MAP2*, *NEFL*, and *TrkB* upon RA-mediated neuronal  
3 differentiation of SHSY-5Y cells by RT-qPCR. (C) Knockdown efficiencies of  
4 the circRNAs circSLC8A1, circHDGFRP3, circCDYL, circZNF609,  
5 circCAMSAP1, circUNC79, circANKIB1, and circTULP4 in L-AN-5 cells  
6 measured by RT-qPCR using circRNA-specific primers.

7

8 **Figure 2 – figure supplement 2** - (A) mRNA expression levels of the neuronal  
9 markers *TUBB3*, *MAP2*, *TrkB*, and *NEFL* upon circRNA knockdown in L-AN-5  
10 cells evaluated by RT-qPCR. (B) Validation of linear ZNF827 (linZNF827)  
11 mRNA levels upon knockdown of circZNF827 in L-AN-5 cells.

12

13 **Figure 2 – figure supplement 3** - (A) Gating strategy for the cell cycle assay  
14 shown in Figure 2D. (B) Flow cytometric analysis of the cell cycle assay also  
15 shown in figure 2D. For all conditions three biological replicates are shown.  
16 +RA: differentiated L-AN-5 cells. -RA: undifferentiated L-AN-5 cells. Irr:  
17 Irrelevant dishRNA. Data are depicted as mean  $\pm$ SD.

18

19 **Figure 3 – figure supplement 1** - (A) *RAR* mRNA transcription rates estimated  
20 after BrU-labeling of newly synthesized RNA by RT-qPCR. Data are depicted  
21 as mean  $\pm$ SD. Asterisks above bars indicate statistical significance difference  
22 relative to the control (Irr). \* $p < 0.05$ .

23

1 **Figure 4 – figure supplement 1** - (A) RT-qPCR evaluating *NGFR* mRNA  
2 expression upon circZNF827 knockdown in L-AN-5 cells and NGF stimulation.  
3 Data are depicted as mean  $\pm$ SD.

4

5 **Figure 5 – figure supplement 1** - (A) Silver stain of circRNA-pull down  
6 samples analyzed by LC-MS/MS. The negative controls included are circRNA  
7 templates transcribed without biotin-CTP (circTULP4 neg and circZNF827  
8 neg). The CTC is a lincRNA with a known binding profile included as reference.  
9 (B-C) Prediction of hnRNP K and -L binding sites in the most 3' part of the  
10 circZNF827-encoding sequence by RBPmap. (D) MFold prediction of the  
11 secondary structure of circZNF827 shown with the predicted hnRNP K and -L  
12 binding sites. (E) Schematic drawing of the stable HEK293 Flp-In T-rex cell-line  
13 for Laccase2 vector-based expression of circZNF827 from a tetracycline  
14 inducible promoter (CMV tet-on). (F) Northern blot showing induction profile for  
15 circZNF827 expression in the stable HEK293 Flp-In T-rex circZNF827 cell-line.  
16 Notably, circZNF827 is shown to be RNase R resistant whereas the linear  
17 loading control ( *$\beta$ -actin* mRNA) is RNase R sensitive. SS: splice site, BSJ: back  
18 splice junction.

19

20 **Figure 6 – figure supplement 1** - circRNA (A), hnRNP K and -L (B) knockdown  
21 validation associated with results shown in Figure 6A-B. (A) Quantification of  
22 circZNF827 levels by RT-qPCR. Protein levels are evaluated by Western  
23 blotting in (B). GAPDH was used as loading control for the Western blots. (D)  
24 ChIP-seq data (ENCODE consortium) in K562 and HepG2 cells showing  
25 interaction between hnRNP K and the *NGFR* promoter. Y-axis displays

1 enrichment (fold change (FC)) over control. #1 and #2: two different dishRNAs  
2 targeting the same RBP.

3

# 4 **References**

5

6 Abdelmohsen, K., Panda, A. C., Munk, R., Grammatikakis, I., Dudekula, D. B.,  
7 De, S., . . . Gorospe, M. (2017). Identification of HuR target circular RNAs  
8 uncovers suppression of PABPN1 translation by CircPABPN1. *RNA*  
9 *Biol*, 14(3), 361-369. doi:10.1080/15476286.2017.1279788

10 AbouHaidar, M. G., Venkataraman, S., Golshani, A., Liu, B., & Ahmad, T.  
11 (2014). Novel coding, translation, and gene expression of a replicating  
12 covalently closed circular RNA of 220 nt. *Proc Natl Acad Sci U S A*,  
13 111(40), 14542-14547. doi:10.1073/pnas.1402814111

14 Ashwal-Fluss, R., Meyer, M., Pamudurti, N. R., Ivanov, A., Bartok, O., Hanan,  
15 M., . . . Kadener, S. (2014). circRNA biogenesis competes with pre-  
16 mRNA splicing. *Mol Cell*, 56(1), 55-66.  
17 doi:10.1016/j.molcel.2014.08.019

18 Bibel, M., Richter, J., Lacroix, E., & Barde, Y. A. (2007). Generation of a defined  
19 and uniform population of CNS progenitors and neurons from mouse  
20 embryonic stem cells. *Nat Protoc*, 2(5), 1034-1043.  
21 doi:10.1038/nprot.2007.147

22 Bothwell, M. (2016). Recent advances in understanding neurotrophin signaling.  
23 *F1000Res*, 5. doi:10.12688/f1000research.8434.1

24 Britze, A., Birkler, R. I., Gregersen, N., Ovesen, T., & Palmfeldt, J. (2014).  
25 Large-scale proteomics differentiates cholesteatoma from surrounding

1 tissues and identifies novel proteins related to the pathogenesis. *PLoS*  
2 *One*, 9(8), e104103. doi:10.1371/journal.pone.0104103

3 Capel, B., Swain, A., Nicolis, S., Hacker, A., Walter, M., Koopman, P., . . .  
4 Lovell-Badge, R. (1993). Circular transcripts of the testis-determining  
5 gene Sry in adult mouse testis. *Cell*, 73(5), 1019-1030. Retrieved from  
6 <https://www.ncbi.nlm.nih.gov/pubmed/7684656>

7 Chekulaeva, M., & Rajewsky, N. (2018). Roles of Long Noncoding RNAs and  
8 Circular RNAs in Translation. *Cold Spring Harb Perspect Biol.*  
9 doi:10.1101/cshperspect.a032680

10 Chen, C. Y., & Sarnow, P. (1995). Initiation of protein synthesis by the  
11 eukaryotic translational apparatus on circular RNAs. *Science*,  
12 268(5209), 415-417. Retrieved from  
13 <https://www.ncbi.nlm.nih.gov/pubmed/7536344>

14 Cocquerelle, C., Mascrez, B., Hetuin, D., & Bailleul, B. (1993). Mis-splicing  
15 yields circular RNA molecules. *FASEB J*, 7(1), 155-160. Retrieved from  
16 <http://www.ncbi.nlm.nih.gov/pubmed/7678559>

17 Conn, S. J., Pillman, K. A., Toubia, J., Conn, V. M., Salmanidis, M., Phillips, C.  
18 A., . . . Goodall, G. J. (2015). The RNA binding protein quaking regulates  
19 formation of circRNAs. *Cell*, 160(6), 1125-1134.  
20 doi:10.1016/j.cell.2015.02.014

21 Cox, J., & Mann, M. (2008). MaxQuant enables high peptide identification rates,  
22 individualized p.p.b.-range mass accuracies and proteome-wide protein  
23 quantification. *Nat Biotechnol*, 26(12), 1367-1372. doi:10.1038/nbt.1511

1 Damgaard, C. K., & Lykke-Andersen, J. (2011). Translational coregulation of  
2 5'TOP mRNAs by TIA-1 and TIAR. *Genes Dev*, 25(19), 2057-2068.  
3 doi:10.1101/gad.17355911

4 Deveson, I. W., Hardwick, S. A., Mercer, T. R., & Mattick, J. S. (2017). The  
5 Dimensions, Dynamics, and Relevance of the Mammalian Noncoding  
6 Transcriptome. *Trends Genet*, 33(7), 464-478.  
7 doi:10.1016/j.tig.2017.04.004

8 Ebbesen, K. K., Hansen, T. B., & Kjems, J. (2016). Insights into circular RNA  
9 biology. *RNA Biol*, 1-11. doi:10.1080/15476286.2016.1271524

10 Gao, Y., Zhang, J., & Zhao, F. (2018). Circular RNA identification based on  
11 multiple seed matching. *Brief Bioinform*, 19(5), 803-810.  
12 doi:10.1093/bib/bbx014

13 Glazar, P., Papavasileiou, P., & Rajewsky, N. (2014). circBase: a database for  
14 circular RNAs. *RNA*, 20(11), 1666-1670. doi:10.1261/rna.043687.113

15 Gudas, L. J., & Wagner, J. A. (2011). Retinoids regulate stem cell  
16 differentiation. *J Cell Physiol*, 226(2), 322-330. doi:10.1002/jcp.22417

17 Hansen, T. B. (2018). Improved circRNA Identification by Combining Prediction  
18 Algorithms. *Front Cell Dev Biol*, 6, 20. doi:10.3389/fcell.2018.00020

19 Hansen, T. B., Jensen, T. I., Clausen, B. H., Bramsen, J. B., Finsen, B.,  
20 Damgaard, C. K., & Kjems, J. (2013). Natural RNA circles function as  
21 efficient microRNA sponges. *Nature*, 495(7441), 384-388.  
22 doi:10.1038/nature11993

23 Hansen, T. B., Veno, M. T., Damgaard, C. K., & Kjems, J. (2016). Comparison  
24 of circular RNA prediction tools. *Nucleic Acids Res*, 44(6), e58.  
25 doi:10.1093/nar/gkv1458

1 Havugimana, P. C., Hart, G. T., Nepusz, T., Yang, H., Turinsky, A. L., Li, Z., . .  
2 . Emili, A. (2012). A census of human soluble protein complexes. *Cell*,  
3 150(5), 1068-1081. doi:10.1016/j.cell.2012.08.011

4 Hollensen, A. K., Andersen, S., Hjorth, K., Bak, R. O., Hansen, T. B., Kjems, J.,  
5 . . . Mikkelsen, J. G. (2018). Enhanced Tailored MicroRNA Sponge  
6 Activity of RNA Pol II-Transcribed TuD Hairpins Relative to Ectopically  
7 Expressed ciRS7-Derived circRNAs. *Mol Ther Nucleic Acids*, 13, 365-  
8 375. doi:10.1016/j.omtn.2018.09.009

9 Hollensen, A. K., Thomsen, R., Bak, R. O., Petersen, C. C., Ermegaard, E. R.,  
10 Aagaard, L., . . . Mikkelsen, J. G. (2017). Improved microRNA  
11 suppression by WPRE-linked Tough Decoy microRNA sponges. *RNA*.  
12 doi:10.1261/rna.061192.117

13 Huang, C., Liang, D., Tatomer, D. C., & Wilusz, J. E. (2018). A length-  
14 dependent evolutionarily conserved pathway controls nuclear export of  
15 circular RNAs. *Genes Dev*, 32(9-10), 639-644.  
16 doi:10.1101/gad.314856.118

17 Huarte, M., Guttman, M., Feldser, D., Garber, M., Koziol, M. J., Kenzelmann-  
18 Broz, D., . . . Rinn, J. L. (2010). A large intergenic noncoding RNA  
19 induced by p53 mediates global gene repression in the p53 response.  
20 *Cell*, 142(3), 409-419. doi:10.1016/j.cell.2010.06.040

21 Hyun, D. H., Kim, J., Moon, C., Lim, C. J., de Cabo, R., & Mattson, M. P. (2012).  
22 The plasma membrane redox enzyme NQO1 sustains cellular  
23 energetics and protects human neuroblastoma cells against metabolic  
24 and proteotoxic stress. *Age (Dordr)*, 34(2), 359-370.  
25 doi:10.1007/s11357-011-9245-1

1 Jeck, W. R., & Sharpless, N. E. (2014). Detecting and characterizing circular  
2 RNAs. *Nat Biotechnol*, 32(5), 453-461. doi:10.1038/nbt.2890

3 Jeck, W. R., Sorrentino, J. A., Wang, K., Slevin, M. K., Burd, C. E., Liu, J., . . .  
4 Sharpless, N. E. (2013). Circular RNAs are abundant, conserved, and  
5 associated with ALU repeats. *RNA*, 19(2), 141-157.  
6 doi:10.1261/rna.035667.112

7 Kaadt, E., Alsing, S., Cecchi, C. R., Damgaard, C. K., Corydon, T. J., &  
8 Aagaard, L. (2019). Efficient Knockdown and Lack of Passenger Strand  
9 Activity by Dicer-Independent shRNAs Expressed from Pol II-Driven  
10 MicroRNA Scaffolds. *Mol Ther Nucleic Acids*, 14, 318-328.  
11 doi:10.1016/j.omtn.2018.11.013

12 Kim, J. H., Hahm, B., Kim, Y. K., Choi, M., & Jang, S. K. (2000). Protein-protein  
13 interaction among hnRNPs shuttling between nucleus and cytoplasm. *J*  
14 *Mol Biol*, 298(3), 395-405. doi:10.1006/jmbi.2000.3687

15 Kleaveland, B., Shi, C. Y., Stefano, J., & Bartel, D. P. (2018). A Network of  
16 Noncoding Regulatory RNAs Acts in the Mammalian Brain. *Cell*, 174(2),  
17 350-362 e317. doi:10.1016/j.cell.2018.05.022

18 Kopp, F., & Mendell, J. T. (2018). Functional Classification and Experimental  
19 Dissection of Long Noncoding RNAs. *Cell*, 172(3), 393-407.  
20 doi:10.1016/j.cell.2018.01.011

21 Kos, A., Dijkema, R., Arnberg, A. C., van der Meide, P. H., & Schellekens, H.  
22 (1986). The hepatitis delta (delta) virus possesses a circular RNA.  
23 *Nature*, 323(6088), 558-560. doi:10.1038/323558a0

24 Kramer, M. C., Liang, D., Tatomer, D. C., Gold, B., March, Z. M., Cherry, S., &  
25 Wilusz, J. E. (2015). Combinatorial control of Drosophila circular RNA

1 expression by intronic repeats, hnRNPs, and SR proteins. *Genes Dev*,  
2 29(20), 2168-2182. doi:10.1101/gad.270421.115

3 Legnini, I., Di Timoteo, G., Rossi, F., Morlando, M., Briganti, F., Sthandier, O.,  
4 . . . Bozzoni, I. (2017). Circ-ZNF609 Is a Circular RNA that Can Be  
5 Translated and Functions in Myogenesis. *Mol Cell*, 66(1), 22-37 e29.  
6 doi:10.1016/j.molcel.2017.02.017

7 Li, Z., Huang, C., Bao, C., Chen, L., Lin, M., Wang, X., . . . Shan, G. (2015).  
8 Exon-intron circular RNAs regulate transcription in the nucleus. *Nat*  
9 *Struct Mol Biol*, 22(3), 256-264. doi:10.1038/nsmb.2959

10 Lyu, J., Yu, X., He, L., Cheng, T., Zhou, J., Cheng, C., . . . Zhou, W. (2015).  
11 The protein phosphatase activity of PTEN is essential for regulating  
12 neural stem cell differentiation. *Mol Brain*, 8, 26. doi:10.1186/s13041-  
13 015-0114-1

14 Ma, X., Zhou, Y., Chai, Y., Wang, X., & Huang, X. (2017). Stat3 Controls  
15 Maturation and Terminal Differentiation in Mouse Hippocampal  
16 Neurons. *J Mol Neurosci*, 61(1), 88-95. doi:10.1007/s12031-016-0820-x

17 Memczak, S., Jens, M., Elefsinioti, A., Torti, F., Krueger, J., Rybak, A., . . .  
18 Rajewsky, N. (2013). Circular RNAs are a large class of animal RNAs  
19 with regulatory potency. *Nature*, 495(7441), 333-338.  
20 doi:10.1038/nature11928

21 Meola, N., Domanski, M., Karadoulama, E., Chen, Y., Gentil, C., Pultz, D., . . .  
22 Jensen, T. H. (2016). Identification of a Nuclear Exosome Decay  
23 Pathway for Processed Transcripts. *Mol Cell*, 64(3), 520-533.  
24 doi:10.1016/j.molcel.2016.09.025

1 Moumen, A., Masterson, P., O'Connor, M. J., & Jackson, S. P. (2005). hnRNP  
2 K: an HDM2 target and transcriptional coactivator of p53 in response to  
3 DNA damage. *Cell*, 123(6), 1065-1078. doi:10.1016/j.cell.2005.09.032  
4 Nigro, J. M., Cho, K. R., Fearon, E. R., Kern, S. E., Ruppert, J. M., Oliner, J. D.,  
5 . . . Vogelstein, B. (1991). Scrambled exons. *Cell*, 64(3), 607-613.  
6 Retrieved from <https://www.ncbi.nlm.nih.gov/pubmed/1991322>  
7 Pamudurti, N. R., Bartok, O., Jens, M., Ashwal-Fluss, R., Stottmeister, C.,  
8 Ruhe, L., . . . Kadener, S. (2017). Translation of CircRNAs. *Mol Cell*,  
9 66(1), 9-21 e27. doi:10.1016/j.molcel.2017.02.021  
10 Pasman, Z., Been, M. D., & Garcia-Blanco, M. A. (1996). Exon circularization  
11 in mammalian nuclear extracts. *RNA*, 2(6), 603-610. Retrieved from  
12 <https://www.ncbi.nlm.nih.gov/pubmed/8718689>  
13 Paz, I., Kosti, I., Ares, M., Jr., Cline, M., & Mandel-Gutfreund, Y. (2014).  
14 RBPmap: a web server for mapping binding sites of RNA-binding  
15 proteins. *Nucleic Acids Res*, 42(Web Server issue), W361-367.  
16 doi:10.1093/nar/gku406  
17 Piwecka, M., Glazar, P., Hernandez-Miranda, L. R., Memczak, S., Wolf, S. A.,  
18 Rybak-Wolf, A., . . . Rajewsky, N. (2017). Loss of a mammalian circular  
19 RNA locus causes miRNA deregulation and affects brain function.  
20 *Science*. doi:10.1126/science.aam8526  
21 Rybak-Wolf, A., Stottmeister, C., Glazar, P., Jens, M., Pino, N., Giusti, S., . . .  
22 Rajewsky, N. (2015). Circular RNAs in the Mammalian Brain Are Highly  
23 Abundant, Conserved, and Dynamically Expressed. *Mol Cell*, 58(5),  
24 870-885. doi:10.1016/j.molcel.2015.03.027

- 1 Salzman, J. (2016). Circular RNA Expression: Its Potential Regulation and  
2 Function. *Trends Genet*, 32(5), 309-316. doi:10.1016/j.tig.2016.03.002
- 3 Salzman, J., Chen, R. E., Olsen, M. N., Wang, P. L., & Brown, P. O. (2013).  
4 Cell-type specific features of circular RNA expression. *PLoS Genet*, 9(9),  
5 e1003777. doi:10.1371/journal.pgen.1003777
- 6 Salzman, J., Gawad, C., Wang, P. L., Lacayo, N., & Brown, P. O. (2012).  
7 Circular RNAs are the predominant transcript isoform from hundreds of  
8 human genes in diverse cell types. *PLoS One*, 7(2), e30733.  
9 doi:10.1371/journal.pone.0030733
- 10 Sanger, H. L., Klotz, G., Riesner, D., Gross, H. J., & Kleinschmidt, A. K. (1976).  
11 Viroids are single-stranded covalently closed circular RNA molecules  
12 existing as highly base-paired rod-like structures. *Proc Natl Acad Sci U*  
13 *S A*, 73(11), 3852-3856. Retrieved from  
14 <https://www.ncbi.nlm.nih.gov/pubmed/1069269>
- 15 Seitz, A. K., Christensen, L. L., Christensen, E., Faarkrog, K., Ostenfeld, M. S.,  
16 Hedegaard, J., . . . Dyrskjot, L. (2017). Profiling of long non-coding RNAs  
17 identifies LINC00958 and LINC01296 as candidate oncogenes in  
18 bladder cancer. *Sci Rep*, 7(1), 395. doi:10.1038/s41598-017-00327-0
- 19 Stagsted, L. V., Nielsen, K. M., Daugaard, I., & Hansen, T. B. (2019).  
20 Noncoding AUG circRNAs constitute an abundant and conserved  
21 subclass of circles. *Life Sci Alliance*, 2(3). doi:10.26508/lsa.201900398
- 22 Suenkel, C., Cavalli, D., Massalini, S., Calegari, F., & Rajewsky, N. (2020). A  
23 Highly Conserved Circular RNA Is Required to Keep Neural Cells in a  
24 Progenitor State in the Mammalian Brain. *Cell Rep*, 30(7), 2170-2179  
25 e2175. doi:10.1016/j.celrep.2020.01.083

- 1 Thompson, P. J., Dulberg, V., Moon, K. M., Foster, L. J., Chen, C., Karimi, M.  
2 M., & Lorincz, M. C. (2015). hnRNP K coordinates transcriptional  
3 silencing by SETDB1 in embryonic stem cells. *PLoS Genet*, 11(1),  
4 e1004933. doi:10.1371/journal.pgen.1004933
- 5 Thomsen, R., Solvsten, C. A., Linnet, T. E., Blechingberg, J., & Nielsen, A. L.  
6 (2010). Analysis of qPCR data by converting exponentially related Ct  
7 values into linearly related X0 values. *J Bioinform Comput Biol*, 8(5),  
8 885-900. doi:10.1142/s0219720010004963
- 9 Tomonaga, T., & Levens, D. (1995). Heterogeneous nuclear ribonucleoprotein  
10 K is a DNA-binding transactivator. *J Biol Chem*, 270(9), 4875-4881.  
11 doi:10.1074/jbc.270.9.4875
- 12 Wan, C., Borgeson, B., Phanse, S., Tu, F., Drew, K., Clark, G., . . . Emili, A.  
13 (2015). Panorama of ancient metazoan macromolecular complexes.  
14 *Nature*, 525(7569), 339-344. doi:10.1038/nature14877
- 15 Yamashita, T., Tucker, K. L., & Barde, Y. A. (1999). Neurotrophin binding to the  
16 p75 receptor modulates Rho activity and axonal outgrowth. *Neuron*,  
17 24(3), 585-593. doi:10.1016/s0896-6273(00)81114-9
- 18 Yang, Y., Fan, X., Mao, M., Song, X., Wu, P., Zhang, Y., . . . Wang, Z. (2017).  
19 Extensive translation of circular RNAs driven by N(6)-methyladenosine.  
20 *Cell Res*, 27(5), 626-641. doi:10.1038/cr.2017.31
- 21 Ying, Q. L., Wray, J., Nichols, J., Battle-Morera, L., Doble, B., Woodgett, J., . .  
22 . Smith, A. (2008). The ground state of embryonic stem cell self-renewal.  
23 *Nature*, 453(7194), 519-523. doi:10.1038/nature06968
- 24 Zhang, X. O., Dong, R., Zhang, Y., Zhang, J. L., Luo, Z., Zhang, J., . . . Yang,  
25 L. (2016). Diverse alternative back-splicing and alternative splicing

1 landscape of circular RNAs. *Genome Res*, 26(9), 1277-1287.

2 doi:10.1101/gr.202895.115

3 Zhu, X., Libby, R. T., de Vries, W. N., Smith, R. S., Wright, D. L., Bronson, R.

4 T., . . . John, S. W. (2012). Mutations in a P-type ATPase gene cause

5 axonal degeneration. *PLoS Genet*, 8(8), e1002853.

6 doi:10.1371/journal.pgen.1002853

7

8

9

Figure 1

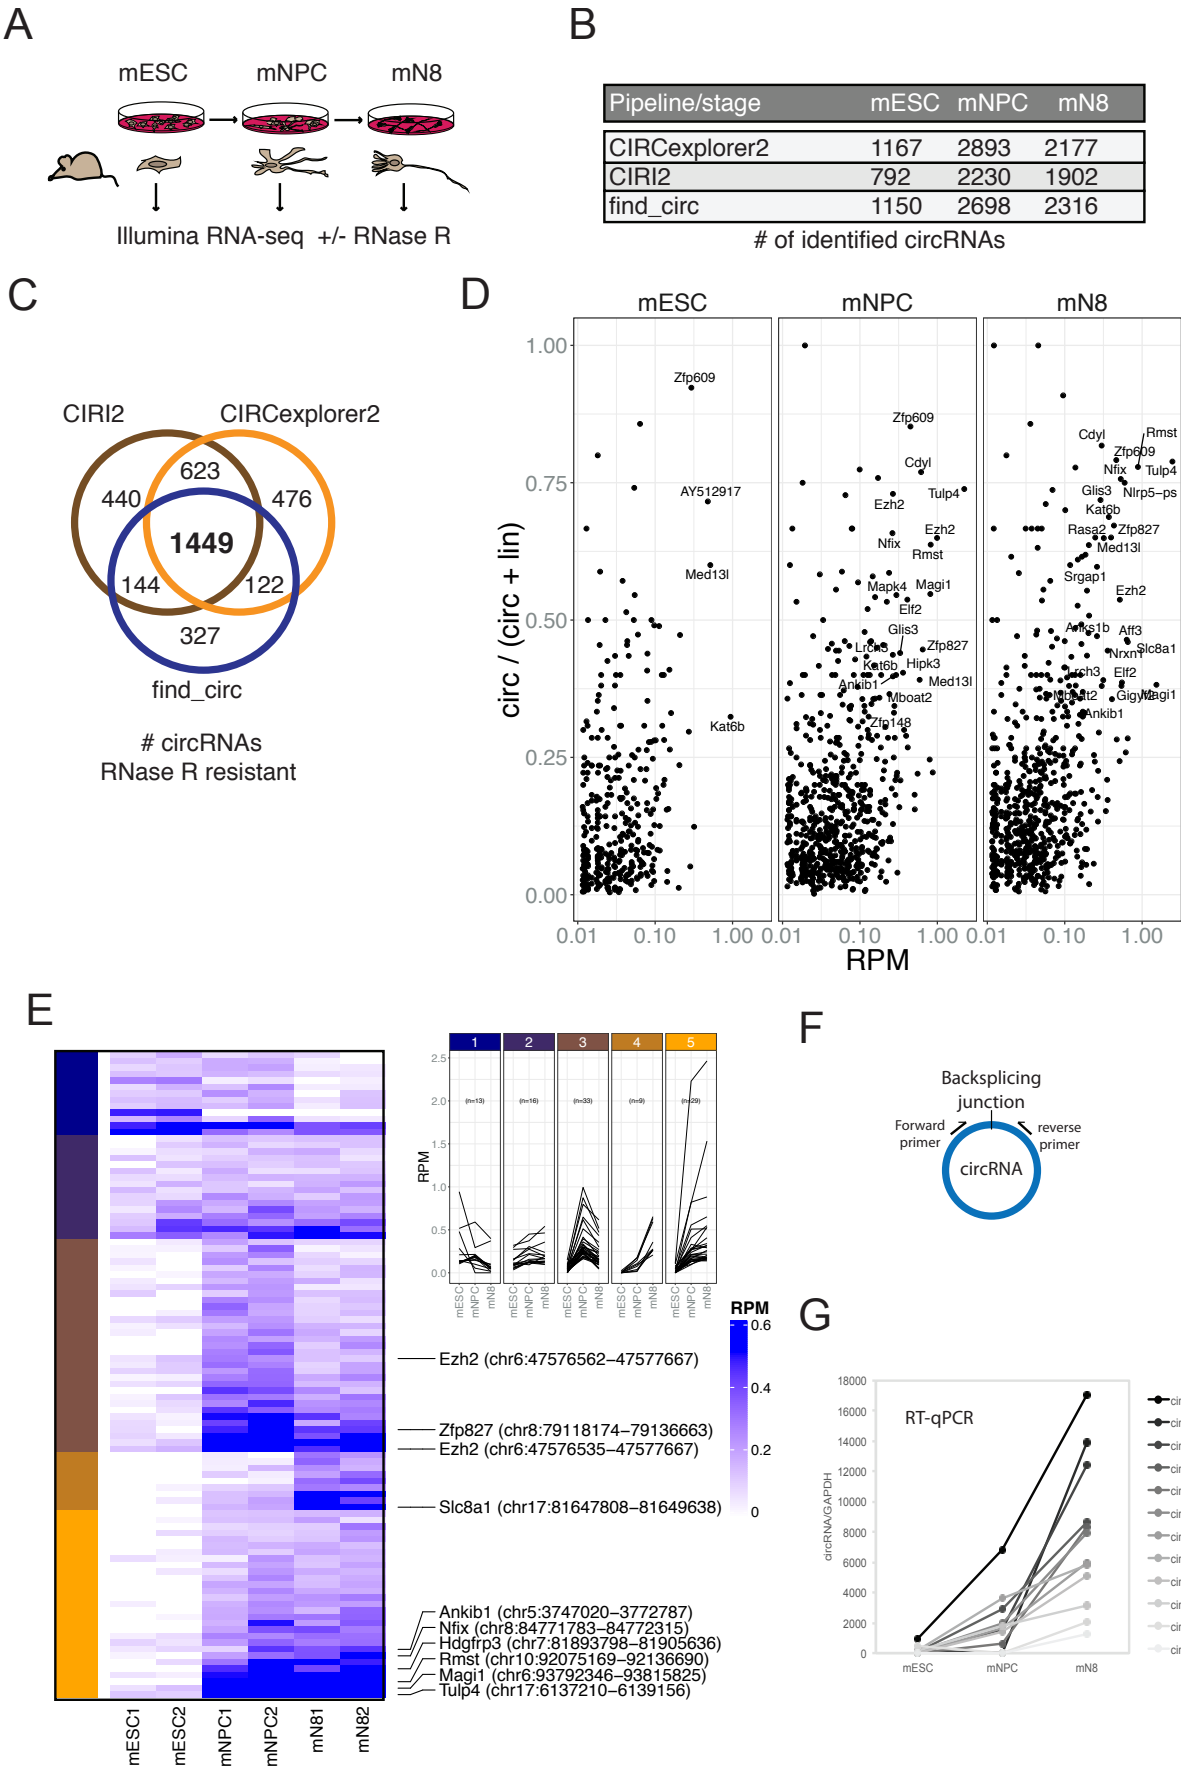

Figure 2

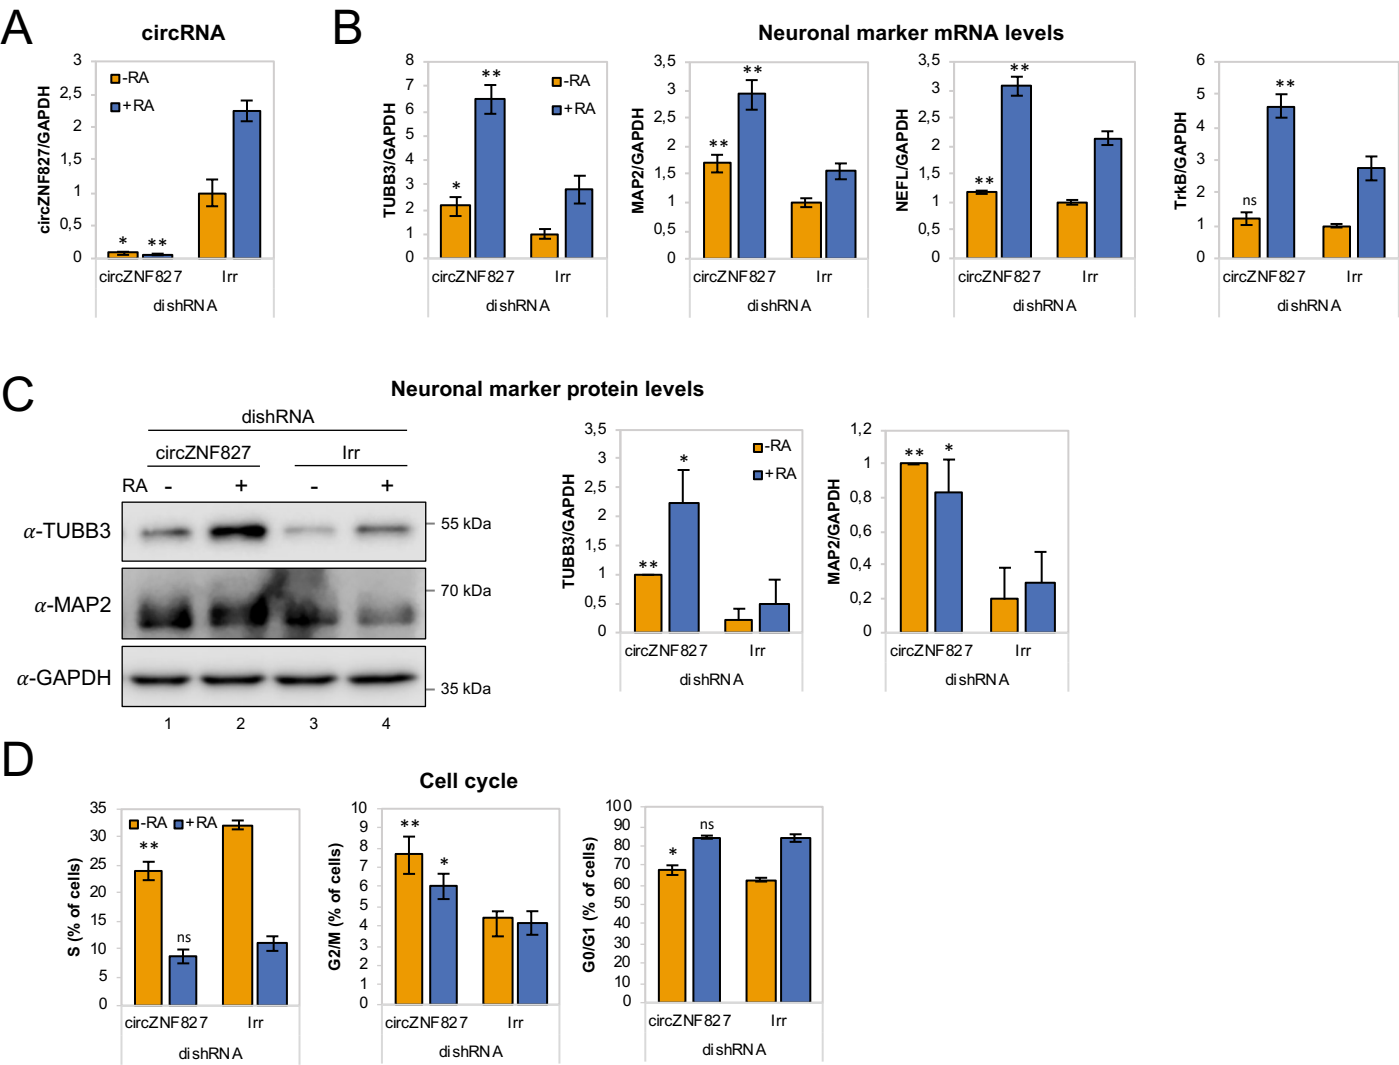

Figure 3

A

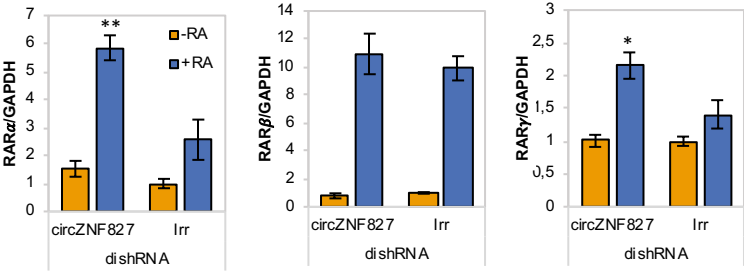

B

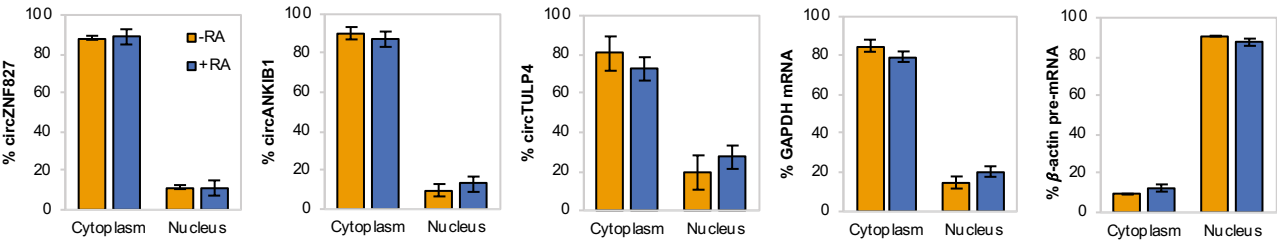

C

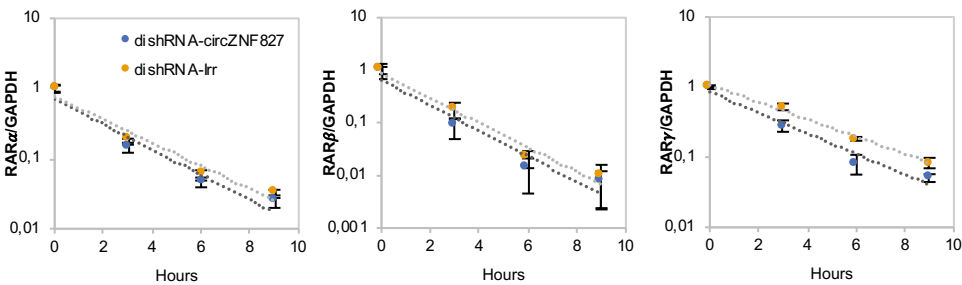

| dishRNA                  | circZNF827 | Irr        |
|--------------------------|------------|------------|
| T <sub>1/2</sub> (hours) |            |            |
| RARα                     | 1.68 ±0.06 | 1.84 ±0.12 |
| RARβ                     | 1.22 ±0.20 | 1.28 ±0.34 |
| RARγ                     | 2.04 ±0.08 | 2.46 ±0.23 |

Figure 4

A

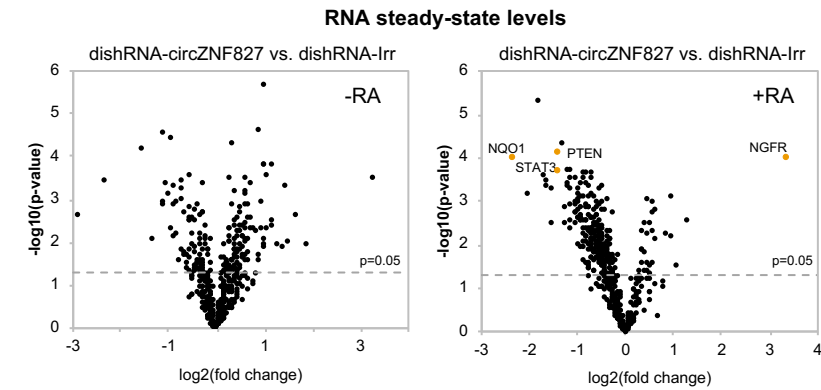

B

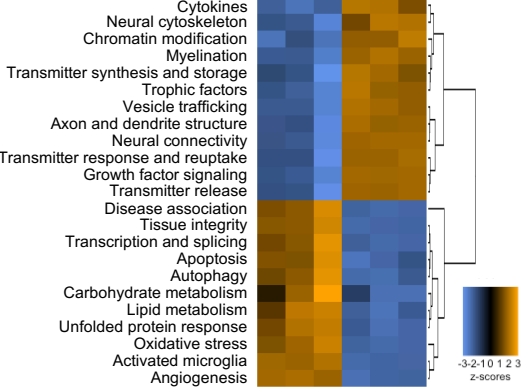

C

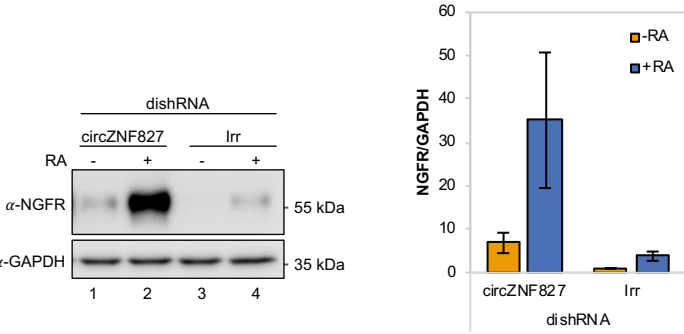

D

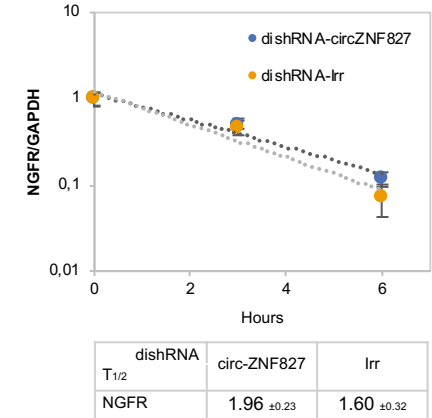

E

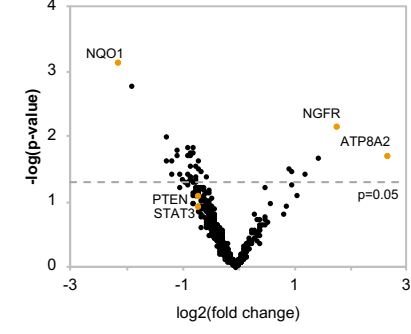

F

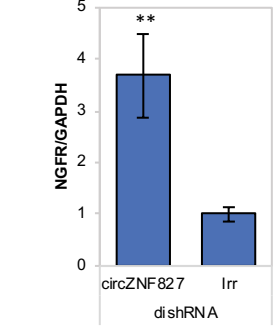

H

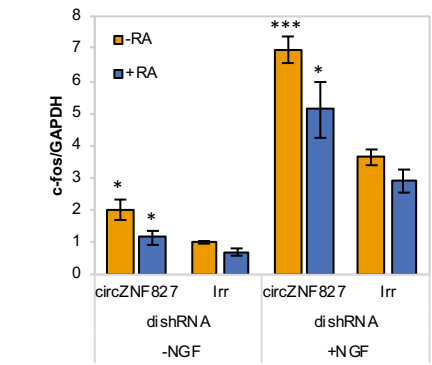

G

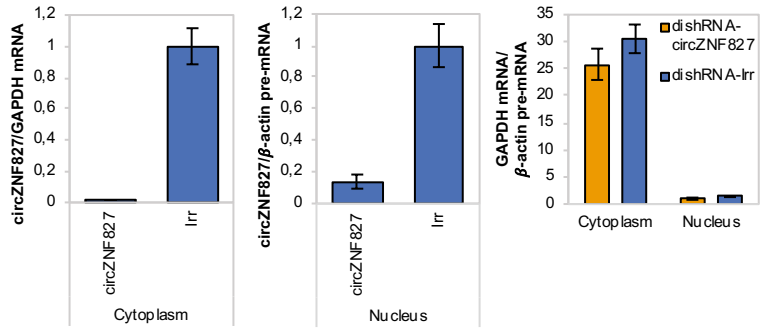

Figure 5

A

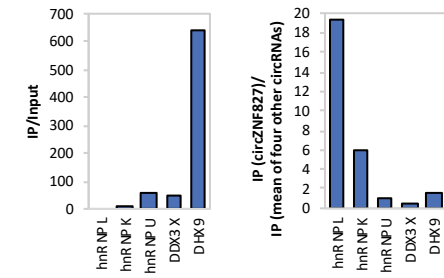

B

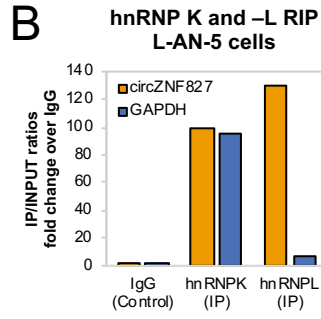

C

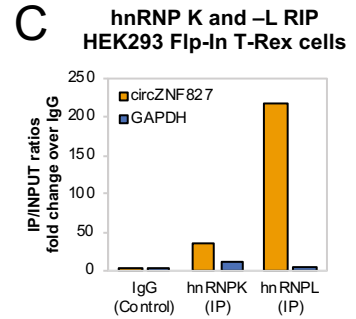

D

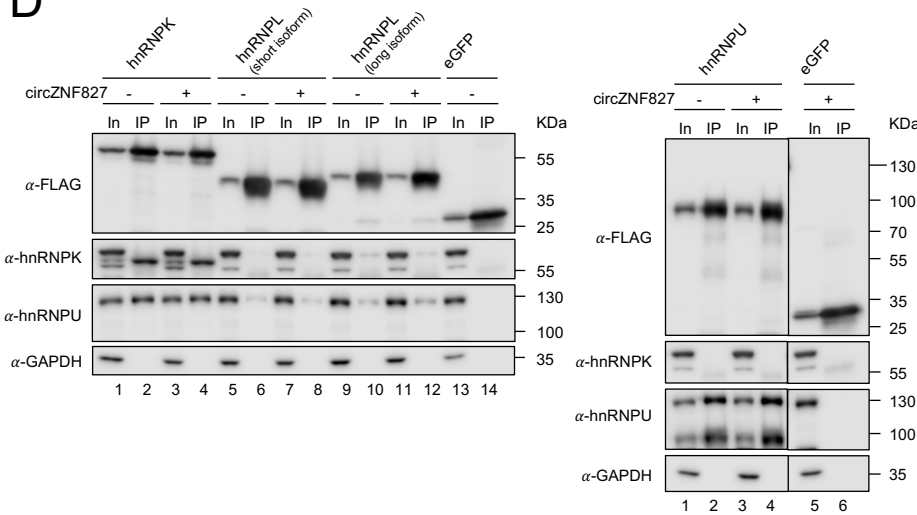

E

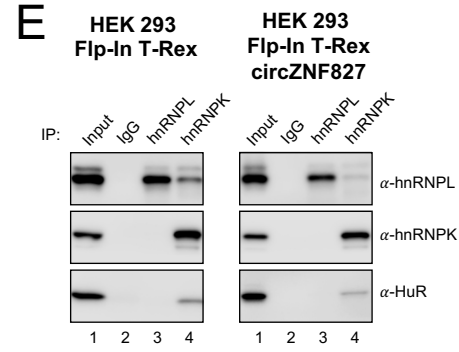

F

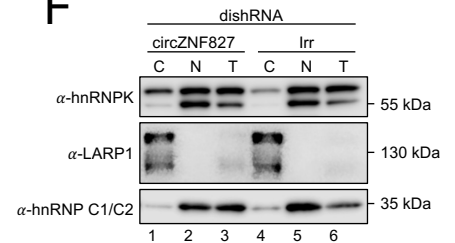

G

HEK 293 Flp-In T-Rex

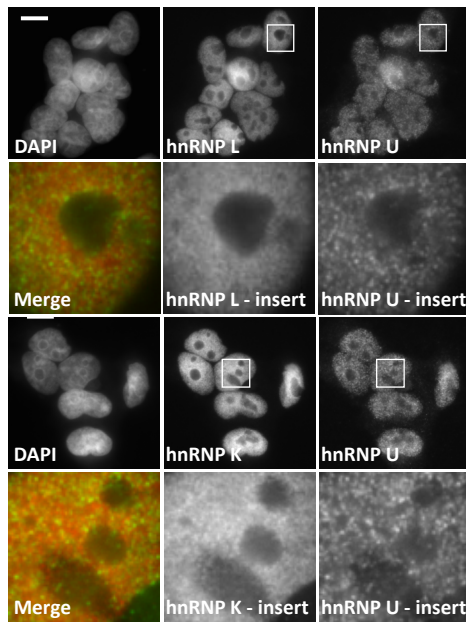

HEK 293 Flp-In T-Rex circZNF827

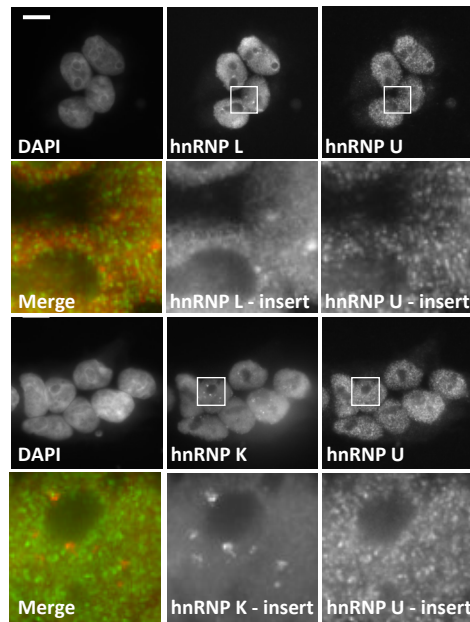

Figure 6

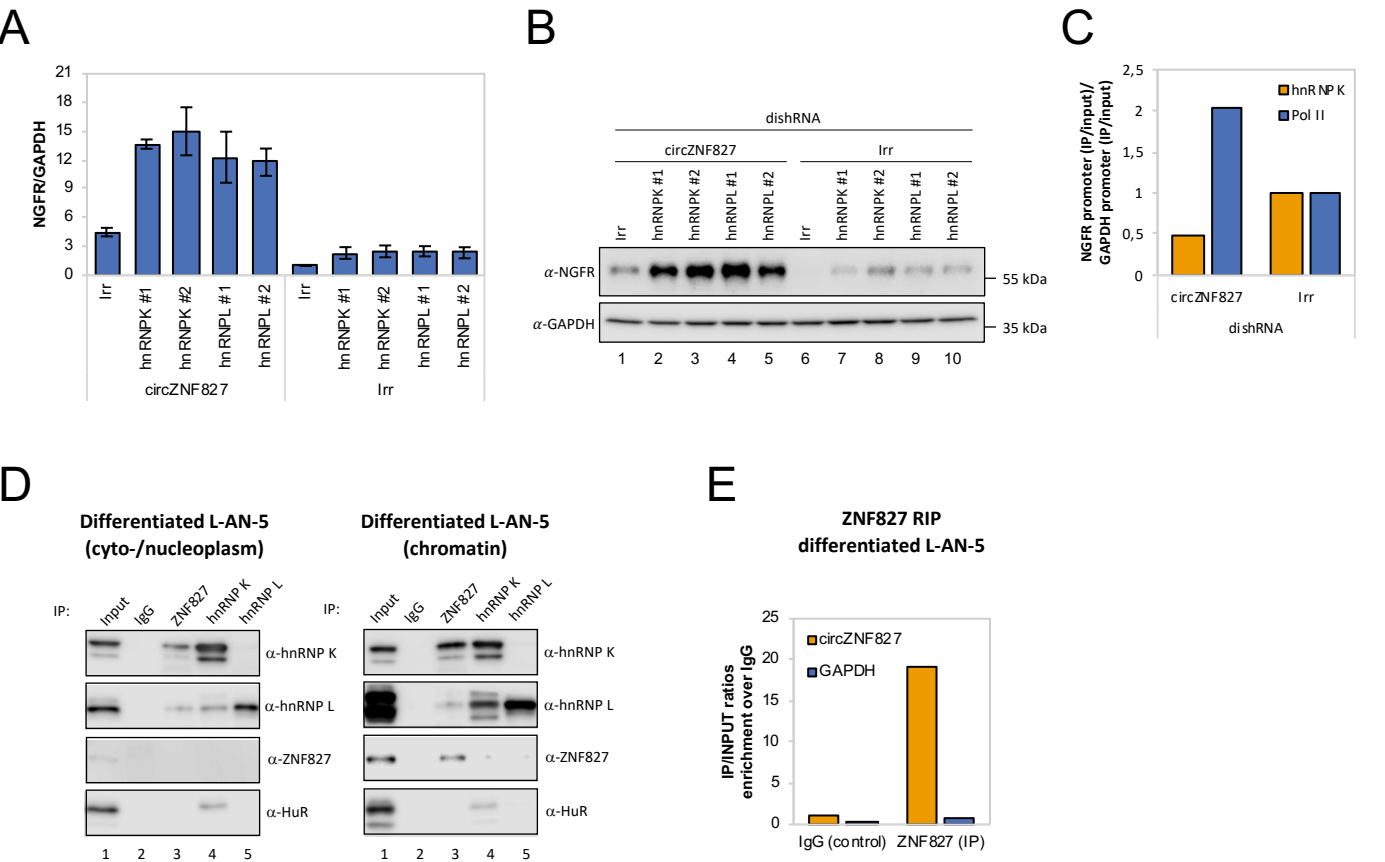

Figure 7

Normal circZNF827 level

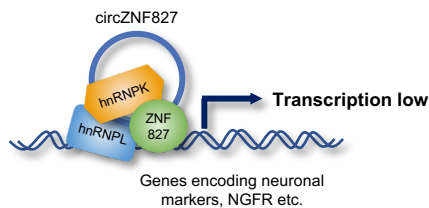

Low circZNF827 level

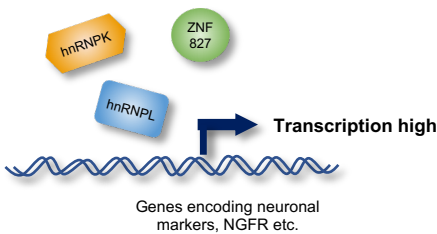

Source: https://www.biorxiv.org/content/10.1101/791798v2.full.pdf
