# Supplementary material for: circZNF827 nucleates a transcription inhibitory complex to balance neuronal differentiation
Source: bioRxiv or medRxiv preprint supplement (doi:10.1101/791798), 2020-05-15

Figure 1 – figure supplement 1

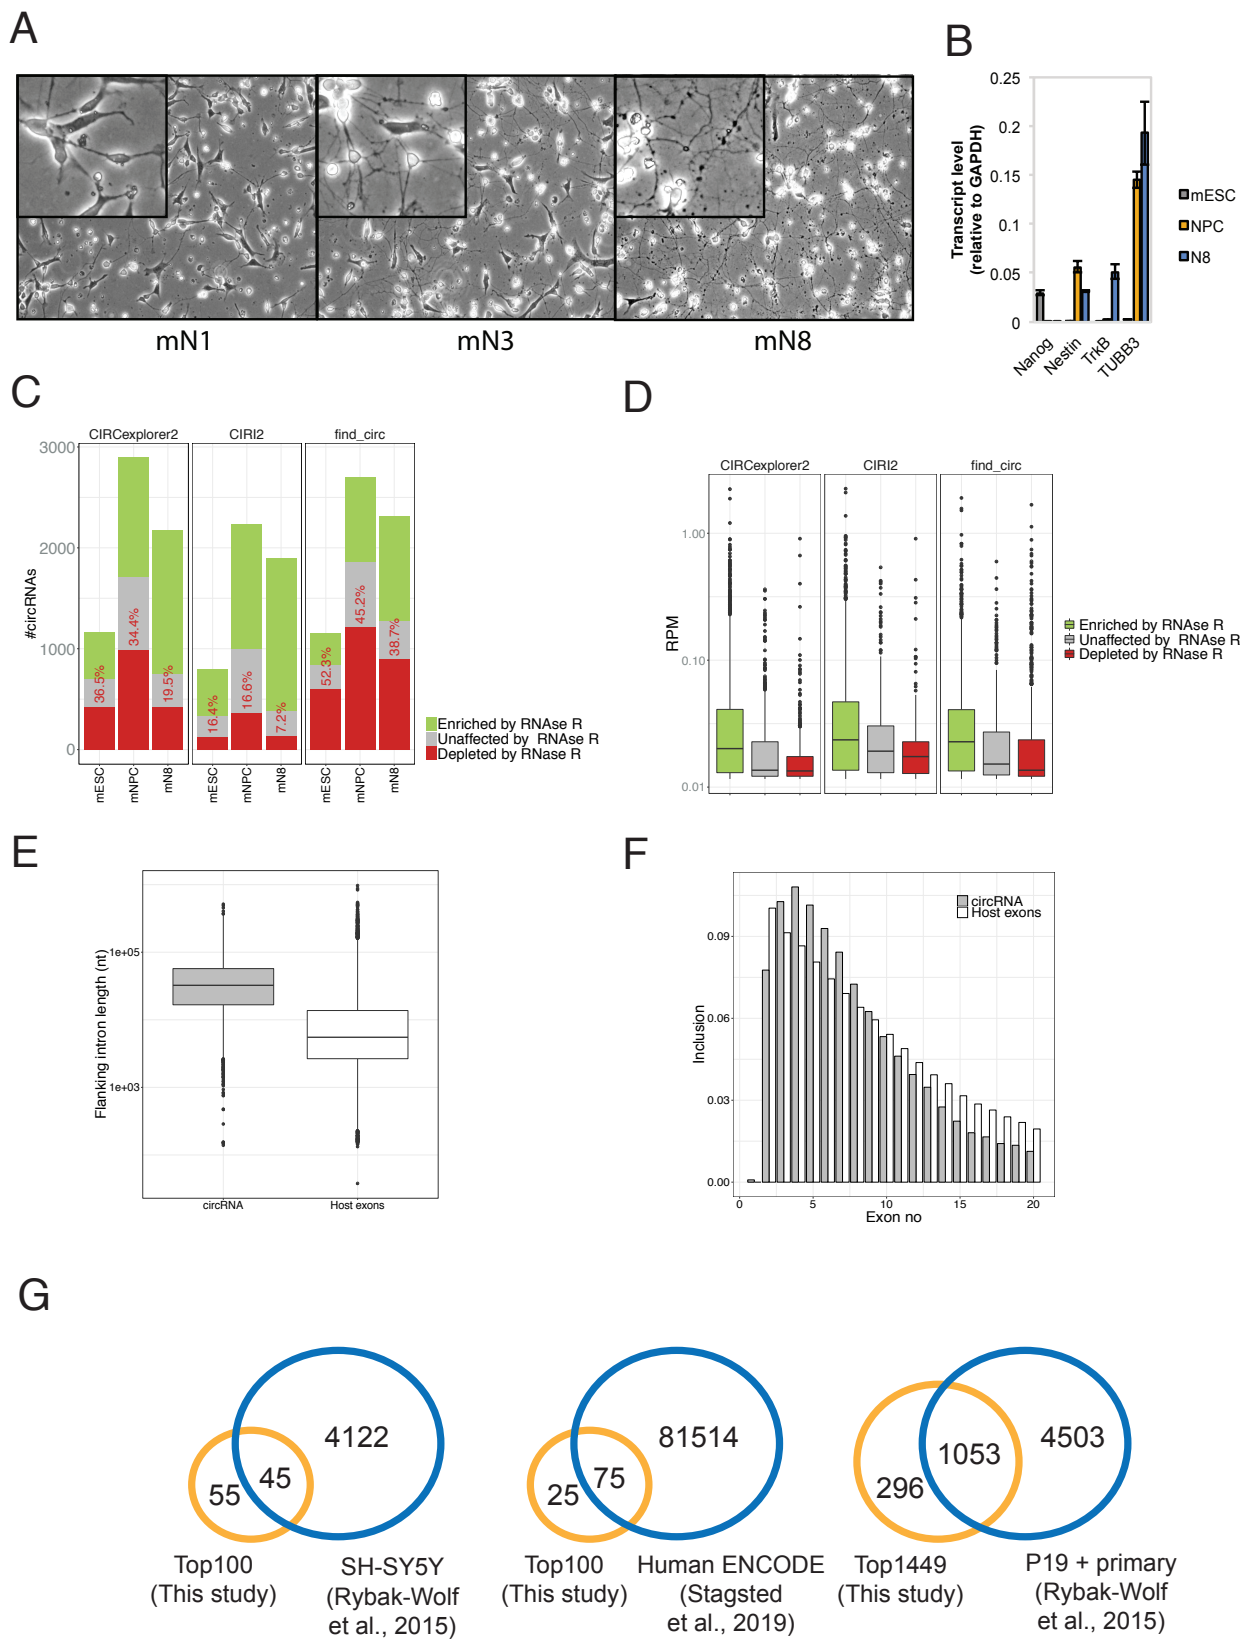

Figure 2 – figure supplement 1

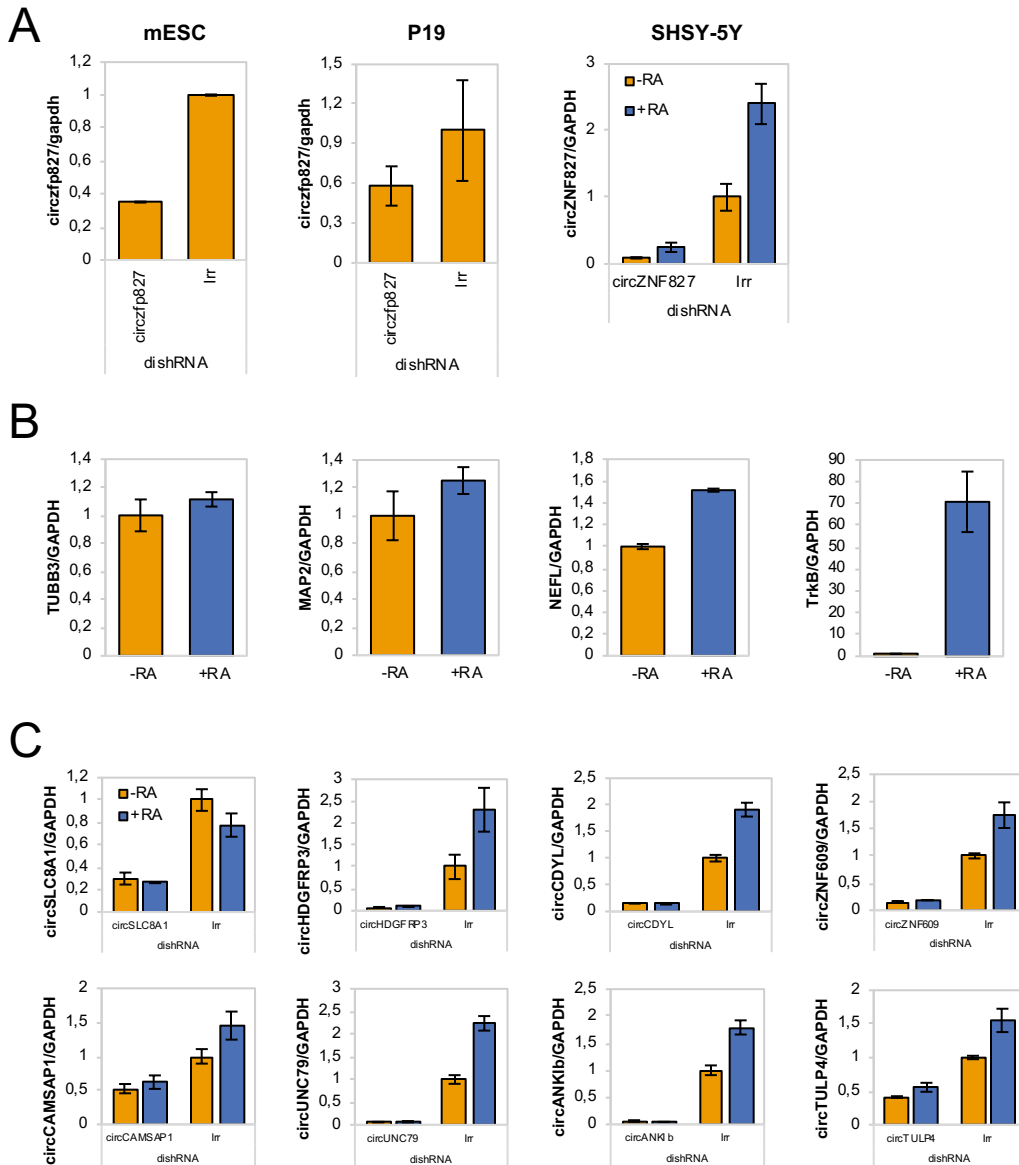

Figure 2 – figure supplement 2

A

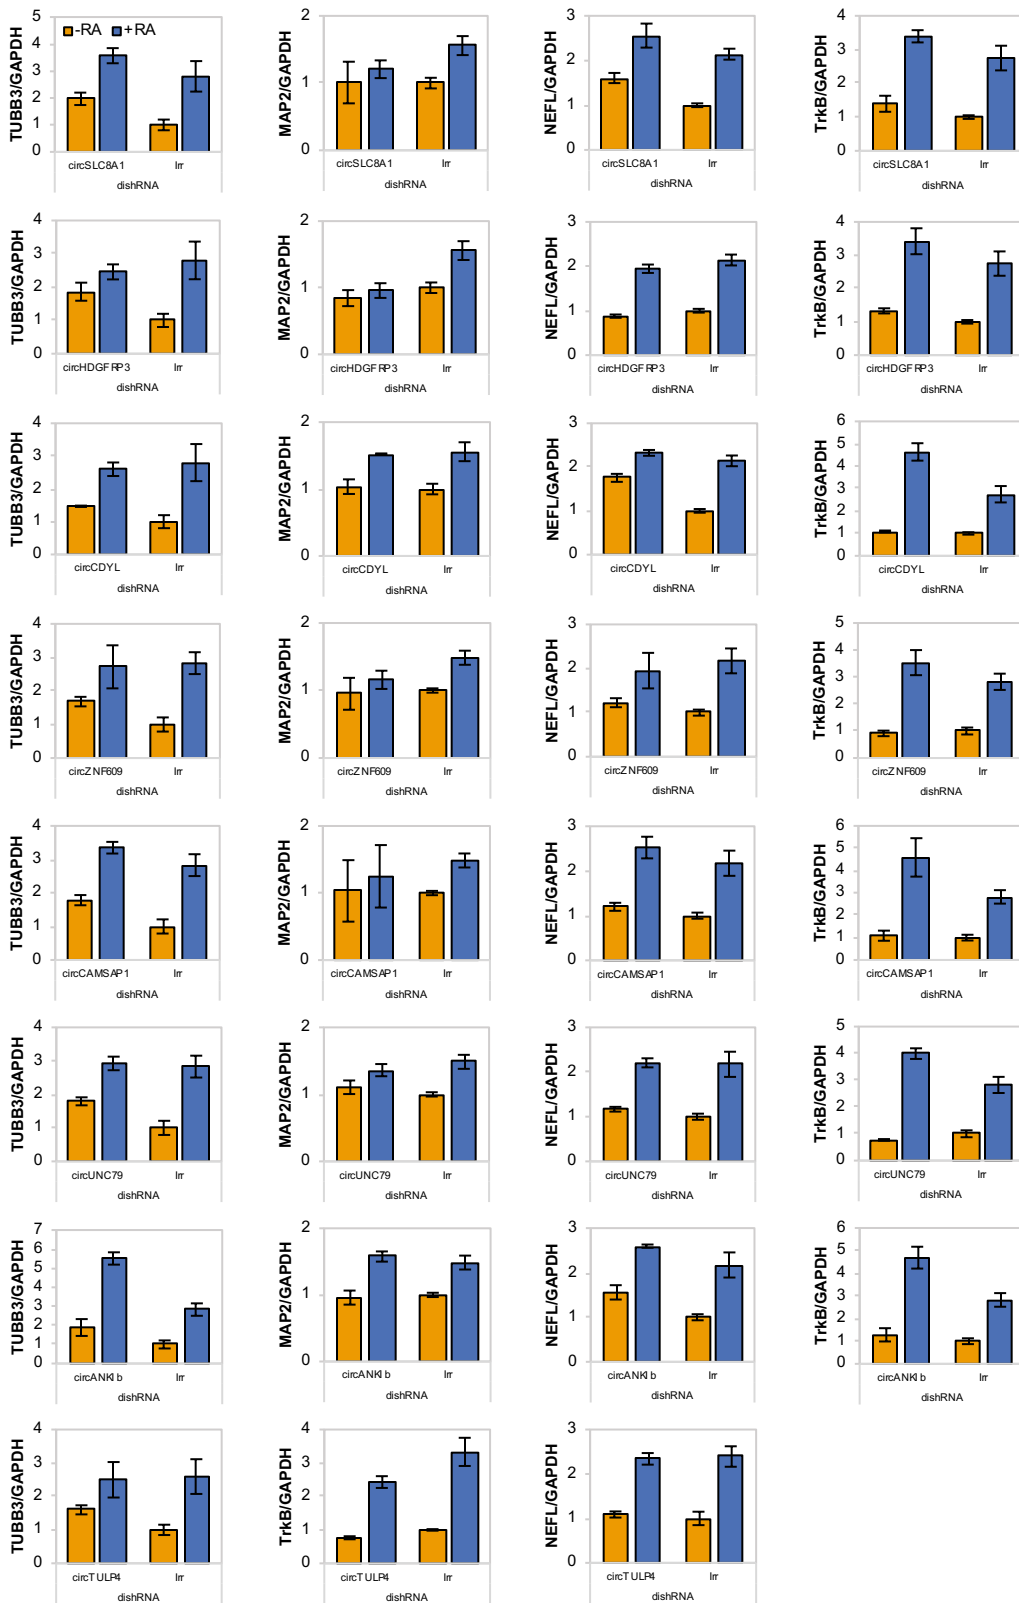

B

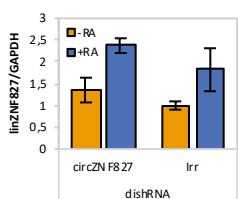

Figure 2 - figure supplement 3

A

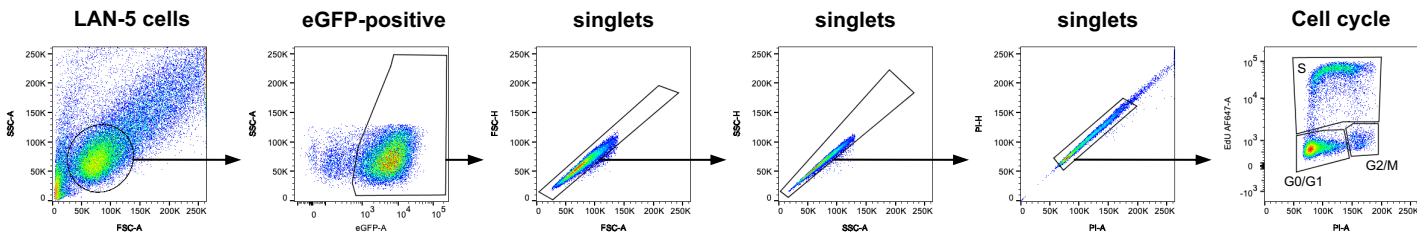

B

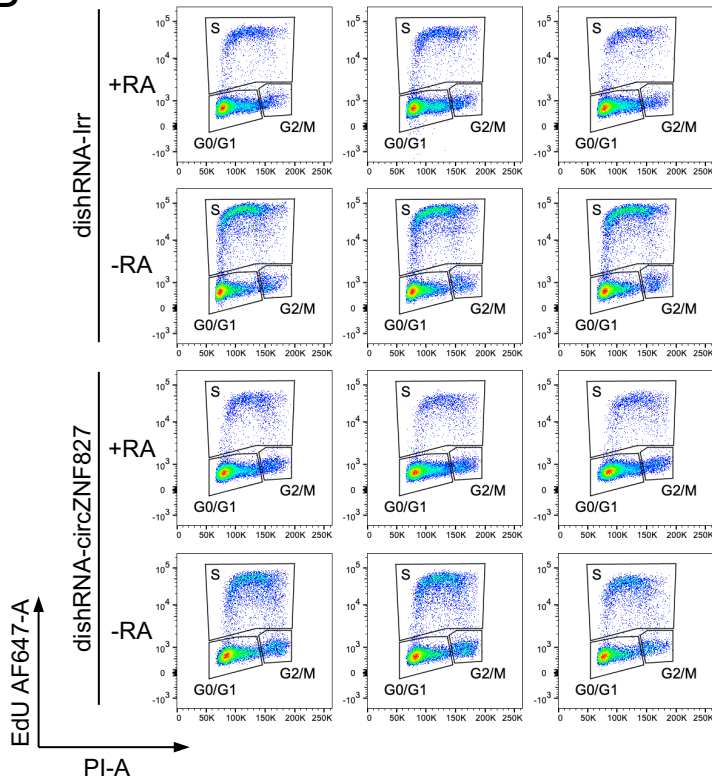

Figure 3 - figure supplement 1

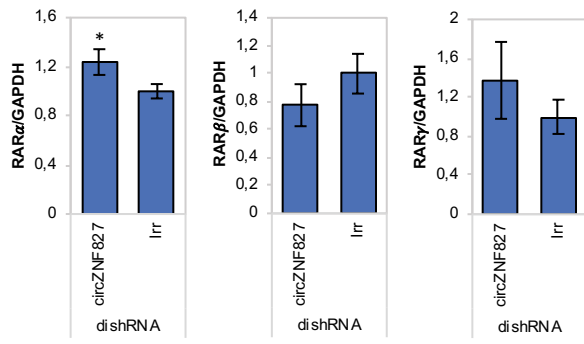

Figure 4 - figure supplement 1

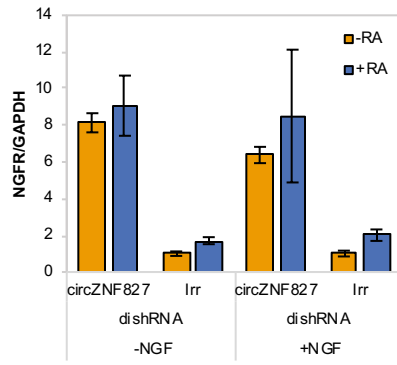

Figure 5 – figure supplement 1

A

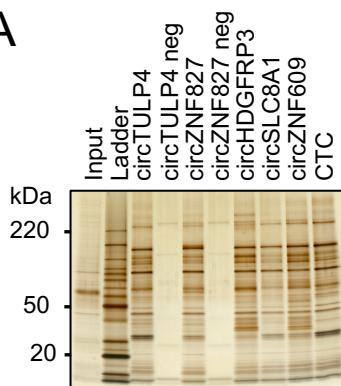

C

hsa\_circZNF827:  
 BSJ\_CGGAAAGCTACAAGGAAACACAGATGGTGAAGATTAAAGAGGAACCCATGGAGGTT  
 GACATCCAGGACTCCCATGTCTCGATATCACCCAGCCGGAATGTTGGCTACAGCATTTA  
 ATCGGGCGAGAGAAAACCGAACCCCTTACAGAAGATGCCAGAGGGCAGAGTACCCCCAGAG  
 AGAAACCTCTTCAGTCAGGATATCTCTGTGAAAATGGCTCCGAGCTCCTCTTTCACTG  
 TCAGAAAAAGTGAGCAAAGAGCACAATCATACAAAAGAAAACACCATCCGGA**CCACGACC**  
**AGCCC**TTTCTTTTCAGA**AGACACATT**TAGACAATCACCATTCACCTCCAATTCAAAGAA  
 CTGCTGCCAGTGACTCCGTGCTGCACGGAGAATATCAGCTCCAG\_BSJ

Putative binding sites: **hnRNP K** and **hnRNP L**

B

| Protein: HNRNPK(Hs/Mm) |         |                                                                     |         |          |  |
|------------------------|---------|---------------------------------------------------------------------|---------|----------|--|
| Position               | Motif   | Occurrence                                                          | Z-score | P-value  |  |
| 295                    | ccawmcc | aaagaaaaaccacccgaccacga <b>ccagccc</b> uuuuuuucagaagacacauuuga      | 1.739   | 4.10e-02 |  |
| Protein: HNRNPL(Hs/Mm) |         |                                                                     |         |          |  |
| Position               | Motif   | Occurrence                                                          | Z-score | P-value  |  |
| 257                    | acacrav | aacugucagaaaaagugagcaaaag <b>gcacaa</b> ucauacaaaaagaaacacccauccgga | 2.887   | 1.94e-03 |  |
| 259                    | amayama | cugucagaaaaagugagcaaaag <b>gcacaa</b> ucauacaaaaagaaacacccauccgga   | 2.813   | 2.45e-03 |  |
| 263                    | amayama | cagaaaaagugagcaaaagcaca <b>ucauca</b> aaagaaaaacacccauccgga         | 2.987   | 1.41e-03 |  |
| 265                    | acacrav | gaaaaagugagcaaaagcaca <b>ucauca</b> aaagaaaaacacccauccgga           | 3.394   | 3.44e-04 |  |
| 267                    | acacrav | aaaagugagcaaaagcaca <b>ucauca</b> aaagaaaaacacccauccgga             | 3.465   | 2.65e-04 |  |
| 275                    | amayama | gcaaaagcacaaucauacaaaa <b>aaacac</b> auccggaaccagaccgcccuuu         | 3.093   | 9.91e-04 |  |
| 277                    | acacrav | aaagcacaaucauacaaaa <b>aaacac</b> auccggaaccagaccgcccuuu            | 3.563   | 1.83e-04 |  |
| 289                    | acacrav | cauacaaaaagaaacacccauccgga <b>ccacga</b> ccgcccuuuucagaagacaca      | 2.972   | 1.48e-03 |  |
| 314                    | amayama | ccagcaccgcccuuuucaga <b>agacac</b> uuuagacaaucacauaccucca           | 2.480   | 6.57e-03 |  |
| 316                    | amayama | acgaccgcccuuuucaga <b>agacac</b> uuuagacaaucacauaccucca             | 2.133   | 1.65e-02 |  |
| 326                    | amayama | cuuuuuucagaagacacauuag <b>acaauc</b> acauuaccuccaaaucaaaagac        | 2.160   | 1.54e-02 |  |

RBPmap precisions, <http://rbpmap.technion.ac.il/>

D

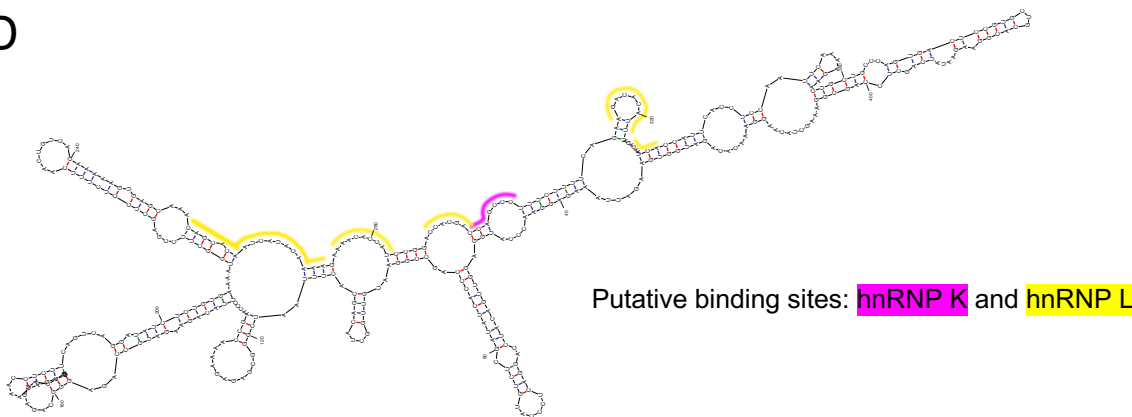

E

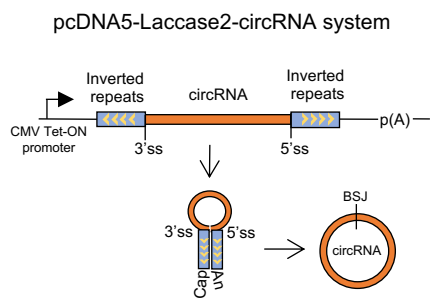

F

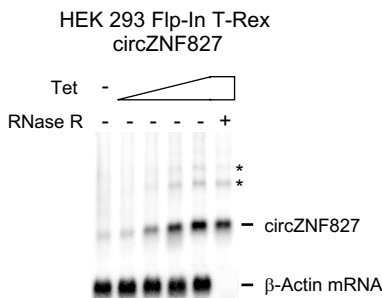

Figure 6 – figure supplement 1

A

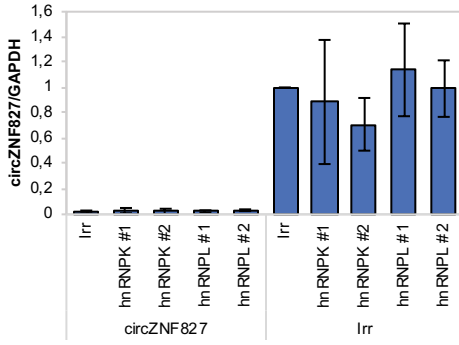

B

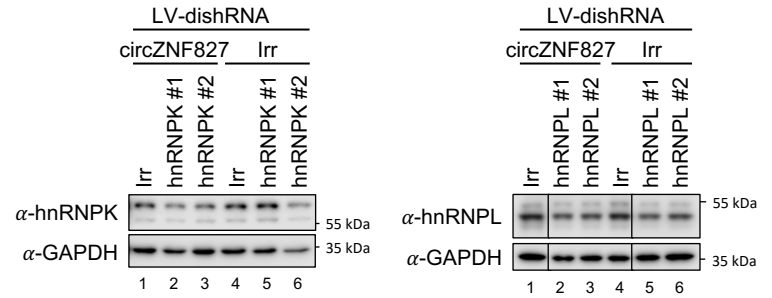

C

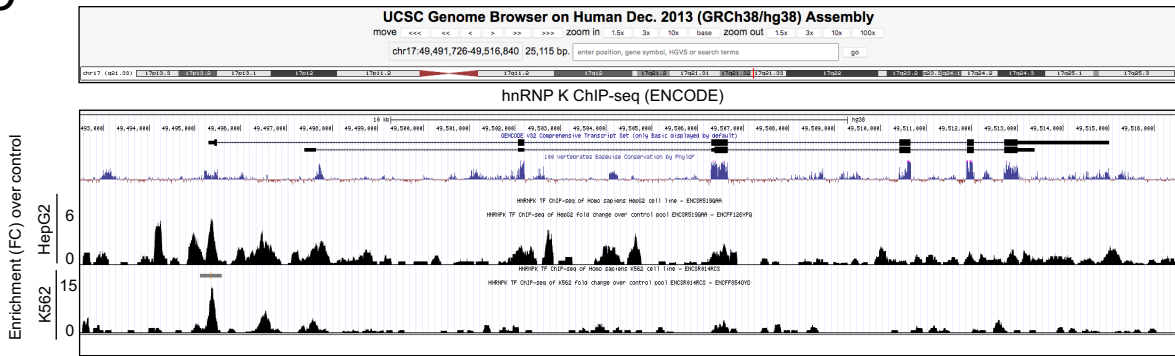

Supplement: Supplementary file [file media-1.pdf]
