# Supplementary material for: circZNF827 nucleates a transcription inhibitory complex to balance neuronal differentiation
Source: bioRxiv or medRxiv preprint supplement (doi:10.1101/791798), 2020-05-15
Supplement: Supplementary file [file media-2.pdf]

Table S1

See Supplementary Table S1 (excel file)

Table S2

| Human              |             |           |             |                  | Mouse   |             |            |             |                  |         |
|--------------------|-------------|-----------|-------------|------------------|---------|-------------|------------|-------------|------------------|---------|
| circRNA            | GRCh37/hg19 |           | circBase ID | Gene             | circRNA | GRCm38/mm10 |            | circBase ID | Gene             |         |
|                    | Chromosome  | Start     |             |                  |         | End         | Chromosome |             |                  | Start   |
| <b>circANK1b</b>   | chr7        | 91924202  | 91957214    | hsa_circ_0135062 | ANK1B1  | chr5        | 3747020    | 3772787     | mmu_circ_0001311 | Ank1b1  |
| <b>circCAMSAP1</b> | chr9        | 138773478 | 138774924   | hsa_circ_0001900 | CAMSAP1 | chr2        | 25821182   | 25822468    | mmu_circ_0009762 | Camsap1 |
| <b>circCDYL</b>    | chr6        | 4891946   | 4892613     | hsa_circ_0008285 | CDYL    | chr13       | 35907777   | 35908444    | mmu_circ_0000451 | Cdyl    |
| <b>circHDGFRP3</b> | chr15       | 83819966  | 83832827    | hsa_circ_0000646 | HDGFRP3 | chr7        | 89038684   | 89050522    | mmu_circ_0001589 | Hdgfrp3 |
| <b>circHIPK3</b>   | chr11       | 33307958  | 33309057    | hsa_circ_0000284 | HIPK3   | chr2        | 104310905  | 104312004   | mmu_circ_0001052 | Hipk3   |
| <b>circMAGI</b>    | chr3        | 65464266  | 65479306    | hsa_circ_0066459 | MAGI1   | chr6        | 93742340   | 93765819    | mmu_circ_0001496 | Magi1   |
| <b>circMED13L</b>  | chr12       | 116675272 | 116675510   | hsa_circ_0028587 | MED13L  | chr5        | 119043341  | 119043579   | mmu_circ_0001396 | Med13l  |
| <b>circNFIX</b>    | chr19       | 13135834  | 13136366    | hsa_circ_0005660 | NFIX    | chr8        | 87295682   | 87296214    | mmu_circ_0001704 | Nfix    |
| <b>circRMST</b>    | chr12       | 97886238  | 97954825    | hsa_circ_0099634 | RMST    | chr10       | 91537914   | 91599435    | mmu_circ_0000205 | Rmst    |
| <b>circSLC8A1</b>  | chr2        | 40655612  | 40657441    | hsa_circ_0005232 | SLC8A1  | chr17       | 82047148   | 82048978    | mmu_circ_0000823 | Slc8a1  |
| <b>circTULP4</b>   | chr6        | 158733082 | 158735300   | hsa_circ_0131202 | TULP4   | chr17       | 6137210    | 6139156     | mmu_circ_0000723 | Tulp4   |
| <b>circUNC79</b>   | chr14       | 93934016  | 93963632    | hsa_circ_0102954 | UNC79   | chr12       | 104229559  | 104260086   | mmu_circ_0000411 | Unc79   |
| <b>circZNF609</b>  | chr15       | 64791491  | 64792365    | hsa_circ_0000615 | ZNF609  | chr9        | 65642428   | 65643302    | mmu_circ_0001797 | Zfp609  |
| <b>circZNF827</b>  | chr4        | 146744573 | 146770713   | hsa_circ_0001447 | ZNF827  | chr8        | 81642073   | 81660562    | mmu_circ_0001698 | Zfp827  |

Table S3

| dishRNA-circZNF827 vs. dishRNA-lrr +RA<br>fold change>2, p<0.05 |                            | dishRNA-circZNF827 vs. dishRNA-lrr -RA<br>fold change>2, p<0.05 |                            | dishRNA-circZNF827 vs. dishRNA-lrr +RA, BrU IP<br>fold change>2, p<0.05 |                            |
|-----------------------------------------------------------------|----------------------------|-----------------------------------------------------------------|----------------------------|-------------------------------------------------------------------------|----------------------------|
| <i>Upregulated genes</i>                                        | <i>Downregulated genes</i> | <i>Upregulated genes</i>                                        | <i>Downregulated genes</i> | <i>Upregulated genes</i>                                                | <i>Downregulated genes</i> |
| NGFR                                                            | NQO1                       | FN1                                                             | NTNG1                      | NQO1                                                                    | ATP8A2                     |
| SYT13                                                           | NTS                        | NQO1                                                            | FOS                        | NTS                                                                     | NGFR                       |
| NTRK1                                                           | FN1                        | TNR                                                             | GRM8                       | FN1                                                                     | MYC                        |
|                                                                 | BNIP3                      | TNC                                                             | SNCAIP                     | TNR                                                                     | SYT13                      |
|                                                                 | TNR                        | DDC                                                             | CDKN1A                     | TNC                                                                     | PMP22                      |
|                                                                 | NEGR1                      | BNIP3                                                           | FAS                        | TAF4B                                                                   |                            |
|                                                                 | TBPL1                      | NEGR1                                                           | LRP1                       | NELL2                                                                   |                            |
|                                                                 | TNC                        | STAT3                                                           | PLA2G16                    | FXN                                                                     |                            |
|                                                                 | PTEN                       |                                                                 | ACHE                       | NEGR1                                                                   |                            |
|                                                                 | STAT3                      |                                                                 | DCX                        |                                                                         |                            |
|                                                                 | GTF2A1                     |                                                                 | CADPS                      |                                                                         |                            |
|                                                                 | JAM3                       |                                                                 | ARC                        |                                                                         |                            |
|                                                                 | OXR1                       |                                                                 | PRKCE                      |                                                                         |                            |
|                                                                 | CHRNA7                     |                                                                 | STX1B                      |                                                                         |                            |
|                                                                 | PPT1                       |                                                                 |                            |                                                                         |                            |
|                                                                 | MMP16                      |                                                                 |                            |                                                                         |                            |
|                                                                 | MYH10                      |                                                                 |                            |                                                                         |                            |
|                                                                 | PLCB4                      |                                                                 |                            |                                                                         |                            |
|                                                                 | NELL2                      |                                                                 |                            |                                                                         |                            |
|                                                                 | GALC                       |                                                                 |                            |                                                                         |                            |
|                                                                 | CHMP2B                     |                                                                 |                            |                                                                         |                            |
|                                                                 | PLS1                       |                                                                 |                            |                                                                         |                            |
|                                                                 | SORL1                      |                                                                 |                            |                                                                         |                            |
|                                                                 | LPAR1                      |                                                                 |                            |                                                                         |                            |
|                                                                 | GSTP1                      |                                                                 |                            |                                                                         |                            |
|                                                                 | MGMT                       |                                                                 |                            |                                                                         |                            |
|                                                                 | PGK1                       |                                                                 |                            |                                                                         |                            |
|                                                                 | EIF2S1                     |                                                                 |                            |                                                                         |                            |
|                                                                 | IDE                        |                                                                 |                            |                                                                         |                            |

Table S4

| Oligonucleotides for construction of pFRT/U6-dishRNA     |                                                             |                                                    |
|----------------------------------------------------------|-------------------------------------------------------------|----------------------------------------------------|
|                                                          | Sense (5'-3')                                               | Antisense (5'-3')                                  |
| hscircTULP4                                              | GATCACAAATCTCGCTATTGTGGCCCCACAATAGCGAGATTGCTTTTT            | TCGAAAAAGCAAATCTCGCTATTGTGGGCCACAATAGCGAGATTGT     |
| hscircZNF609                                             | GATCACAAATCATTGCTTTTCAGACGAAAAGCAATGATGTTGCTTTTT            | TCGAAAAAAGCAACATCATTGCTTTTCGCTGTGAAAAGCAATGATGTTGT |
| hscircSLC8A1                                             | GATCAGTCACAACCTAACAAATTTTATAATTTAGGTTGTGACCTTTTT            | TCGAAAAAAGGTCACAACCTAACAAATTTAGAAATTTAGGTTGTGACT   |
| hscircHDGFRP3                                            | GATCAAGTTTCATCAATCCCTTCACTGGAAAGGATGATGAACCTTTTT            | TCGAAAAAAGAGTTTCATCAATCCCTTCCAGTGAAGGATTTGATGAAC   |
| hscircCDYL                                               | GATCAATCTTTCAACCTTTCCCGTTGGAAAGGTTGAAAGGATCTTTTT            | TCGAAAAAAGATCCTTTCAACCTTTCCAACGGGAAAGGTTGAAAGGATT  |
| hscircCAMSAP1                                            | GATCAAGGATGTTATCTTGTGATCAACAAGATAACATCCCTCTTTTT             | TCGAAAAAAGGAGGATGTTATCTTGTGATCAACAAGATAACATCCCTT   |
| hscircZNF827                                             | GATCAGTAGCTTTCCGCTGGAGCTGACTCCAGCGGAAAGCTACCTTTTT           | TCGAAAAAAGGTAGCTTTCCGCTGGAGTCACTCCAGCGGAAAGCTACT   |
| hscircANKIB1                                             | GATCATCTTTCACATTCATGAGCTCGCTCATGAATGTGAAAGACTTTTT           | TCGAAAAAAGTCTTTCACATTCATGAGCGAGCTCATGAATGTGAAAGAT  |
| hscircUNC79                                              | GATCACTTGGAAAGCAACTGTGACTGACACAGTTGCTTCCAAGCTTTTT           | TCGAAAAAAGCTTGGAAAGCAACTGTGACTGACACAGTTGCTTCCAAGT  |
| mmcirczfp827                                             | GATCAGTAGCTTTCCGCTGGAGCAGACTCCAGCGGAAAGCTACCTTTTT           | TCGAAAAAAGGTAGCTTTCCGCTGGAGTCTGCTCCAGCGGAAAGCTACT  |
| hnRNPK #1                                                | GATCAATAATTCCTCTGCTAGACTCCTAGCAGGAGGAATATCTTTTT             | TCGAAAAAAGATAATTCCTCTGCTAGACTCCTAGCAGGAGGAATATT    |
| hnRNPK #2                                                | GATCATTCATAAGCCATCTGCCATTCAGGATGGCTTATGAACCTTTTT            | TCGAAAAAAGTTCATAAGCCATCTGCCGAATGCCAGATGGCTTATGAAT  |
| hnRNPL #1                                                | GATCAATTTACCTTCTCCACATTTGCTGTGGAGAAGGTGAAATCTTTTT           | TCGAAAAAAGATTTACCTTCTCCACAGCAATGTGGAGAAGGTGAAATT   |
| hnRNPL #2                                                | GATCACACTTTTGCTGAGAACTATTCTCAGGCAAAAGTCTTTTT                | TCGAAAAAAGCAGCTTTTGCTGAGAACTATTCTCAGGCAAAAGTGT     |
| lrr                                                      | GATCATCGTCATAACGTTTATAGCGGTATGAACGTTATGACGACTTTTT           | TCGAAAAAAGTCTGTCATAACGTTTATAGCGGTATGAACGTTATGACGAT |
| Primers for construction of pCCL/U6-dishRNA-PGK-eGFP-MCS |                                                             |                                                    |
|                                                          | Sense (5'-3')                                               | Antisense (5'-3')                                  |
| U6-dishRNA                                               | AAAATCGATAAGGTCGGGCAGGAAGAGGG                               | AAACGTACGAAACGGGCCCTCTAGACTCG                      |
| Primers for construction of pcDNA3/circRNA               |                                                             |                                                    |
|                                                          | Sense (5'-3')                                               | Antisense (5'-3')                                  |
| circZNF827                                               | AAAGGATCCCGGAAAGCTACAAGGAAACAC                              | AAAGCGGCCGCTGGAGCTGATATTTCTCCG                     |
| circTULP4                                                | AAAGGATCCGATTTGTAAGACTCCAGGGCCTCCC                          | AAAGCGGCCGCTCGCTATTGTGGCCCGGAGGTTG                 |
| circZNF609                                               | AAAAGCTTTGCAATGATGTTGTCCACTGG                               | AAAGCGGCCGCTTTTTCAGACTTGCATTTCTTTAG                |
| circHDGFRP3                                              | AAAGGATCCATTGATGAACCTCCAGAGGG                               | AAAGCGGCCGCTTCACTGGTTTTCTGCAAG                     |
| circSLC8A1                                               | AAAGGATCCGTTGTGACAGTTGGAAGTGTG                              | AAAGCGGCCGCAAAATTTTCATCTTCTGGA                     |
| Primers for construction of pcDNA3.1(+)-Laccase2-circRNA |                                                             |                                                    |
|                                                          | Sense (5'-3')                                               | Antisense (5'-3')                                  |
| circZNF827                                               | AAATTAATTAACGGAAAGCTACAAGGAAACAC                            | AAACCGCGGCTGGAGCTGATATTTCTTCCG                     |
| Primers for construction of pcDNA5_FRT/TO-FLAG-RBP       |                                                             |                                                    |
|                                                          | Sense (5'-3')                                               | Antisense (5'-3')                                  |
| hnRNPU                                                   | ATTAGGATCCATGAGTTCCTCGCCTGTAA                               | ATTAGCGCCGCTCAATAATATCTTGGTGAT                     |
| DHX9                                                     | ATTAGGATCCATGGGTGACGTTAAAAATTTTC                            | ATTAGCGCCGCTTAATAGCGCCACCTCCTC                     |
| DDX3X                                                    | ATTAGGATCCATGAGTCAATGTTGGCAGTGG                             | ATTAGCGCCGCTCAGTTACCCACCAGTCAA                     |
| hnRNPK                                                   | AAAGGTACCATGGAACCTGAACAGCCAGA                               | AAAGCGGCCGCTTAGAATCCTTCAACATCTG                    |
| hnRNPL (short isoform)                                   | AAAGGATCCATGTCGCGGAGGCTGCTGCC                               | AAAGCGGCCGCTTAGGAGGCGTGTGAGCAG                     |
| hnRNPL (long isoform)                                    | AAAGGATCCATGCCTAAAAAGAGACAAGC                               | AAAGCGGCCGCTTAGGAGGCGTGTGAGCAG                     |
| Primers for RT-qPCR                                      |                                                             |                                                    |
|                                                          | Sense (5'-3')                                               | Antisense (5'-3')                                  |
| mmcircMed13L                                             | CCAACCTGCTGTGTATGG                                          | TGCCCTCCAAAATTTGACCT                               |
| mmcircMagi1                                              | TAGTCCACCCCGGAGAAATGAG                                      | CTTTCATAGGTGCCACTTCC                               |
| mmcircHdgfrp3                                            | TGACACGAGAAACACGACTG                                        | ACTTGTGTTGCTGGAGGCTTC                              |
| mmcircEzh2                                               | TACAGCCTGTGCACATCATG                                        | TTTTACACGCTTCCGCCAAC                               |
| mmcircAnkib1                                             | TATGCTGCCTTAGACAAGCG                                        | AGTGGCAGCTTCTTCTTCC                                |
| mmcircAff3                                               | CAAGCTCTGACGAATCTCC                                         | CTGATGCCTGAACTTCCAGA                               |
| mmcircNfix                                               | TGTCCAGCCACATCACATTG                                        | TTTGACATCCGCTTCTCGTG                               |
| mmcircRmst                                               | GAAGGATCTGCCAAGCTCAC                                        | CACCTTCGCTGACTCCAT                                 |
| mmcircSlc8a1                                             | TCTGGAGCTCGAGGAAATGT                                        | TTGGTGGGAGACTTAATCG                                |
| mmcircTulp4                                              | AGAAACCTGTGTGCAAGAGG                                        | TTTCATGACTGGAAGTCTCG                               |
| mmcircZfp609                                             | CCGGCCACTAAAGAAAGTCA                                        | AGTCAACGTCACCACTCAAG                               |
| mmcircZfp827                                             | AAAAGATCTGCTGCCTGGTG                                        | AGTGTGTAGGCAACTTCC                                 |
| mmNanog                                                  | CCTCCAGCAGATGCAAGAACTC                                      | CTTCAACCACTGGTTTTTCTGCC                            |
| mmNestin                                                 | GAAGGTGGGACGCAACTGCA                                        | TCAGCCTCCAGCAGAGTCTGT                              |
| mmTrkB                                                   | AGCAGCCCTGGTATCAGCTA                                        | CTTGATGTTCTTCCGGGTGT                               |
| mmB-Tub III                                              | ACTTGGAAACCTGGAACCATGG                                      | GGCCTGAATAGGTGTCCAAAGG                             |
| mmGAPDH                                                  | TGGGAAGCTTGTTCATCAACG                                       | TTTTGGCTCCACCTTCAAG                                |
| hscircTULP4                                              | CTGTGTGACAGGAGACGCTAC                                       | CTTCCCCAGTCATTTCAAG                                |
| hscircZNF609                                             | AGGAAGGGGAGAAATGAGTGT                                       | GTTCTCAGACCTGCCACATT                               |
| hscircSLC8A1                                             | GAGGGGAGGATTTTGGAGGAC                                       | AGACTTAATCGCCGATGTT                                |
| hscircHDGFRP3                                            | GCAACGACACAAGAAACACA                                        | GTTTCATGGGTGCCAAAA                                 |
| hscircCDYL                                               | GGCCAGGATACACCCACTA                                         | AGCCTTCCACCGAACCAAA                                |
| hscircCAMSAP1                                            | GATGATCAGACTCGAGAAAGG                                       | ATAACAGCGGCTTAATGTG                                |
| hscircZNF827                                             | TCACCATTACACTCCAATTC                                        | AGTGTGTAGCCAACATTCC                                |
| hscircANKIB1                                             | AGGCCTCAGGATCTTCGTAG                                        | CACCTTCTGGAACACTTCTGCA                             |
| hscircUNC79                                              | CGTATGGGCCCTTCACAAGTG                                       | TCCTGCAAGTACCCGATCTT                               |
| hsRAR $\alpha$                                           | CTGCCTGGACATCTCTGATCC                                       | CAAAGACCAGGTCGGTGAGG                               |
| hsRAR $\beta$                                            | GAAGGAGACTTCAAGGCAAG                                        | ATGGTCAGCACTGGAATTCG                               |
| hsRAR $\gamma$                                           | TCGCTAGAGGCAATTGGGGTG                                       | GGGCATCAGCACTAAGGGAG                               |
| hsTUBB3                                                  | GGCCTCTTCTCACAAGTACG                                        | CCACTCTGACCAAAGATGAAA                              |
| hsTrkB                                                   | ACCACTGTGTGATTCATTC                                         | CCCCATTGTTTCATGTGAGTG                              |
| hsNEFL                                                   | GAGTGAATGGCAGCATACC                                         | TAGCCACTGGTTATGCTTCC                               |
| hsMAP2                                                   | CAAAGAGAATGGGATCAACG                                        | CAGGACTGCTACACGCCCTCAG                             |
| hsGAPDH                                                  | GTCAGCCGATCTTCTTTTG                                         | GCGCCCAATACGACCAATC                                |
| hs $\beta$ -actin pre-mRNA                               | TTCCCCAGTGTGACATGGTG                                        | ACCATGTCAACTGGGGAAG                                |
| hsNGFR                                                   | CCGAGGCACCCAGCAACCC                                         | GGCGCTGTGGTTCACTGGCC                               |
| hsc-FOS                                                  | TCGCCTGTCAACGCGCAGG                                         | GACTGGTCGAGATGGCAGT                                |
| hsZNF827                                                 | ACCCGGATGTTTGTGAGTGTG                                       | ACCACTGTCTGAGTTGAGC                                |
| hshnRNPL                                                 | ACAAACCCCAATCTCAGTGG                                        | CATATTTCTGCGGGGTGATCT                              |
| hsNGFR promoter                                          | CTGATAGGGGCAAGTTAGGG                                        | GCCACAGGTTCACTCTCTT                                |
| hsGAPDH promoter                                         | Pierce Magnetic ChIP Kit (Thermo Scientific)                | Pierce Magnetic ChIP Kit (Thermo Scientific)       |
| Probes for Northern blot (5'-3')                         |                                                             |                                                    |
| circZNF827                                               | TCACCATCTGTGTTTCCCTTGTAGCTTTCCGCTGGAGCTGATATTTCCGCTGACGACGG |                                                    |
| $\beta$ -actin                                           | AATGTCACGCACGATTTCCCGCTCGGCCGTTGGTGGTGAAGCTGTAGCCGC         |                                                    |

Table S5

| Antibody    | Manufacturer                                 | Catalog number |
|-------------|----------------------------------------------|----------------|
| BrU         | BD Biosciences                               | 555627         |
| DDX3X       | Sigma-Aldrich                                | HPA00648       |
| FLAG        | Sigma-Aldrich                                | F7425          |
| GAPDH       | Invitrogen                                   | AM4300         |
| hnRNP C1/C2 | Kind gift from Seraphin Pinol-Roma           |                |
| hnRNPK      | Abcam                                        | ab39975        |
| hnRNPK      | Santa Cruz Biotechnology                     | sc-28380       |
| hnRNPL      | Abcam                                        | ab6106         |
| hnRNPU      | Sigma-Aldrich                                | HPA058707      |
| HuR         | Santa Cruz Biotechnology                     | sc-5261        |
| IgG         | Cell Signaling                               | 2729S          |
| LARP1       | Cell Signaling                               | 70180S         |
| MAP2        | Santa Cruz Biotechnology                     | sc-390543      |
| NGFR        | Cell Signaling                               | 8238S          |
| RNA Pol II  | Thermo Scientific (Pierce Magnetic CHIP Kit) | 26157          |
| TUBB3       | Cell Signaling                               | 8572S          |
| ZNF827      | Santa Cruz Biotechnology                     | sc-514943      |
